# Supplementary material for: Metabolite Profiling of <em>Allium hookeri</em> Leaves using UPLC-qTOF-MS/MS and Senomorphic Activity of Phenolamides
Source: Preprints.org preprint supplement (doi:10.20944/preprints202310.1019.v1), 2023-10-17
Supplement: Supplementary file 1 [file supplementary]

Supplementary Materials

Metabolite Profiling of the Leaves of *Allium hookeri* using UPLC-qTOF-MS/MS and Senomorphic Activity of Phenolamides

Thi-Phuong Doan 1, Mi Zhang 1,Jin-Pyo An 1, Jorge-Eduardo Ponce-Zea 1, Van-Hieu Mai 1, Byeol Ryu 1, Eun Jin Park 1, and Won-Keun Oh 1,*

|  |
| --- |

1 Research Institute of Pharmaceutical Sciences, College of Pharmacy, Seoul National University, Seoul 08826, Republic of Korea; phuongdoan@snu.ac.kr (T.P.D); mintazhang@snu.ac.kr (M.Z); [ntopjp77@gmail.com](mailto:ntopjp77@gmail.com) (J.P.A); [jepz210689@snu.ac.kr](mailto:jepz210689@snu.ac.kr) (J.E.P); [maihieu@snu.ac.kr](mailto:maihieu@snu.ac.kr) (V.H.M); [estrella56@snu.ac.kr](mailto:estrella56@snu.ac.kr) (B.R); eunjin_p@snu.ac.kr (E.J.P); wkoh1@snu.ac.kr (W.K.O)

***** Correspondence: wkoh1@snu.ac.kr; Tel.: +82-2-880-7872

Table of contents

[**Figure S1.** HR-ESI -qTOF-MS/MS chromatography of A. hookeri leaves extract (positive mode) 4](#_Toc147512182)

[**Figure S2.** Feature-based molecular networking of fractions and crude extract from leaves of *Allium hookeri using* HRESI-qTOF-MS/MS. Mass data was recorded in positive mode. 5](#_Toc147512183)

[**Figure S3**. Chemical structures of putative identification of components from leaves of *Allium hookeri* using HRESI-qTOF-MS/MS-based molecular networking. 6](#_Toc147512184)

[**Figure S4**. Mass/mass fragmentation of triterpenoid cluster in FBMN 7](#_Toc147512185)

[**Figure S5**. HRESIMS data of compound **2** 8](#_Toc147512186)

[**Figure S6**. IR(KBr) spectrum of compound **2** 8](#_Toc147512187)

[**Figure S7**. 1H NMR spectrum of compound **2** (600 MHz, pyridine-*d*5) 9](#_Toc147512188)

[**Figure S8**. 13C NMR spectrum of compound **2** (150 MHz, pyridine-*d*5) 10](#_Toc147512189)

[**Figure S9**. HSQC spectrum of compound **2** 11](#_Toc147512190)

[**Figure S10**. HMBC spectrum of compound **2** 12](#_Toc147512191)

[**Figure S11**. COSY spectrum of compound **2** 13](#_Toc147512192)

[**Figure S12**. HRESIMS/MS of compound **1** 14](#_Toc147512193)

[**Figure S13**. IR(KBr) spectrum of compound **1** 14](#_Toc147512194)

[**Figure S14**. 1H NMR spectrum of compound **1** (400 MHz, DMSO-*d*6) 15](#_Toc147512195)

[**Figure S15**. HRESIMS/MS of compound **3** 16](#_Toc147512196)

[**Figure S16.** IR(KBr) spectrum of compound **3** 16](#_Toc147512197)

[**Figure S17**. 1H NMR spectrum of compound **3** (600 MHz, DMSO-*d*6) 17](#_Toc147512198)

[**Figure S18**. 13C NMR spectrum of compound **3** (150 MHz, DMSO-*d*6) 18](#_Toc147512199)

[**Figure S19**. HRESIMS data of compound **4** 19](#_Toc147512200)

[**Figure S20**. UV spectrum of compound **4** 19](#_Toc147512201)

[**Figure S21**. IR(KBr) spectrum of compound **4** 19](#_Toc147512202)

[**Figure S22.** 1H NMR spectrum of compound **4** (500MHz, DMSO-*d*6) 20](#_Toc147512203)

[**Figure S23**. 13C NMR spectrum of compound **4** (125 MHz, DMSO-*d*6) 21](#_Toc147512204)

[**Figure S24**. HRESIMS data of compound **5** 22](#_Toc147512205)

[**Figure S25**. UV spectrum of compound **5** 22](#_Toc147512206)

[**Figure S26**. IR(KBr) spectrum of compound **5** 22](#_Toc147512207)

[**Figure S27**. 1H NMR spectrum of compound **5** (600 MHz, DMSO-*d*6) 23](#_Toc147512208)

[**Figure S28**. 13C NMR spectrum of compound **5** (150 MHz, DMSO-*d*6) 24](#_Toc147512209)

[**Figure S29**. HRESIMS data of compound **6** 25](#_Toc147512210)

[**Figure S30**. IR(KBr) spectrum of compound **6** 25](#_Toc147512211)

[**Figure S31**. 1H NMR spectrum of compound **6** (500 MHz, DMSO-*d*6) 26](#_Toc147512212)

[**Figure S32**. 13C NMR spectrum of compound **6** (125 MHz, DMSO-*d*6) 27](#_Toc147512213)

[**Figure S33**. HRESIMS data of compound **7** 28](#_Toc147512214)

[**Figure S34**. IR(KBr) spectrum of compound **7** 28](#_Toc147512215)

[**Figure S35**. 1H NMR spectrum of compound **7** (400 MHz, DMSO-*d*6) 29](#_Toc147512216)

[**Figure S36**. 13C NMR spectrum of compound **7** (100 MHz, DMSO-*d*6) 30](#_Toc147512217)

[**Figure S37**. HRESIMS data of compound **8** 31](#_Toc147512218)

[**Figure S38**. UV spectrum of compound **8** 31](#_Toc147512219)

[**Figure S39**. IR(KBr) spectrum of compound **8** 31](#_Toc147512220)

[**Figure S40**. 1H NMR spectrum of compound **8** (600 MHz, DMSO-*d*6) 32](#_Toc147512221)

[**Figure S41**. 13C NMR spectrum of compound **8** (150 MHz, DMSO-*d*6) 33](#_Toc147512222)

[**Figure S42**. HRESIMS/MS data of compound **9** 34](#_Toc147512223)

[**Figure S43**. UV spectrum of compound **9** 34](#_Toc147512224)

[**Figure S44**. IR(KBr) spectrum of compound **9** 34](#_Toc147512225)

[**Figure S45**. 1H NMR spectrum of compound **9** (600 MHz, DMSO-*d*6) 35](#_Toc147512226)

[**Figure S46**. 13C NMR spectrum of compound **9** (150 MHz, DMSO-*d*6) 36](#_Toc147512227)

[**Figure S47**. HRESIMS/MS data of compound **10** 37](#_Toc147512228)

[**Figure S48**. IR(KBr) spectrum of compound **10** 37](#_Toc147512229)

[**Figure S49**. 1H NMR spectrum of compound **10** (500 MHz, pyridine-*d*5) 38](#_Toc147512230)

[**Figure S50**. 13C NMR spectrum of compound **10** (125 MHz, pyridine-*d*5) 39](#_Toc147512231)

[**Figure S51**. Inhibitory effects of fractions and single compounds from *A. hookeri* on BLM-induced senescence system in RAW 264.7 cells using nitric oxide (NO) assay kit. 40](#_Toc147512232)

[**Figure S52**. SA-*β*-gal-positive senescent cells on replicative senescent HDF cell. 41](#_Toc147512233)

**Table S1**. Putative identification of components from leaves of *Allium hookeri* using HRESI-qTOF-MS/MS-based molecular networking…………………………………………………42

**Figure S1.** HR-ESI -qTOF-MS/MS chromatography of A. hookeri leaves extract (positive mode)


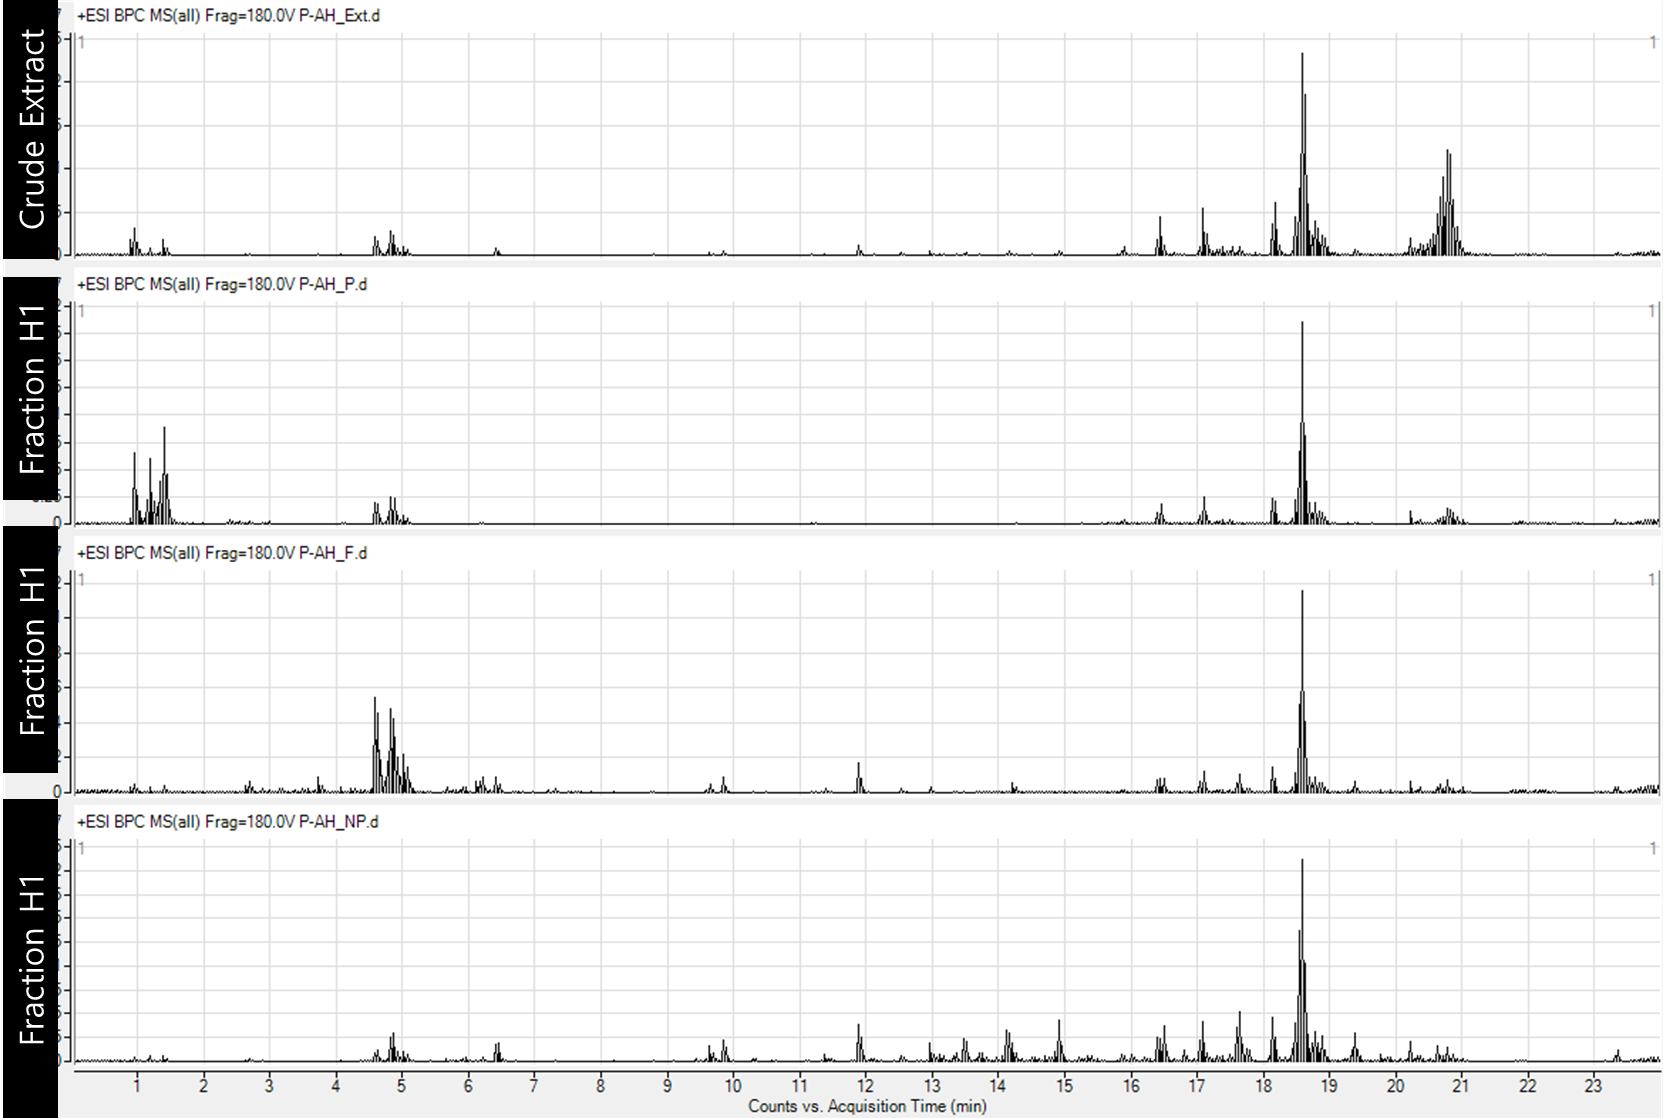


**Figure S2.** Feature-based molecular networking of fractions and crude extract from leaves of *Allium hookeri using* HRESI-qTOF-MS/MS. Mass data was recorded in positive mode.

Data pre-processing using Mzmine3, FBMN was created at GNPS platform and can be found at <https://gnps.ucsd.edu/ProteoSAFe/status.jsp?task=b6f262ecf9994b82bab562336b008eeb>. Data visualzation using Cytoscape software.


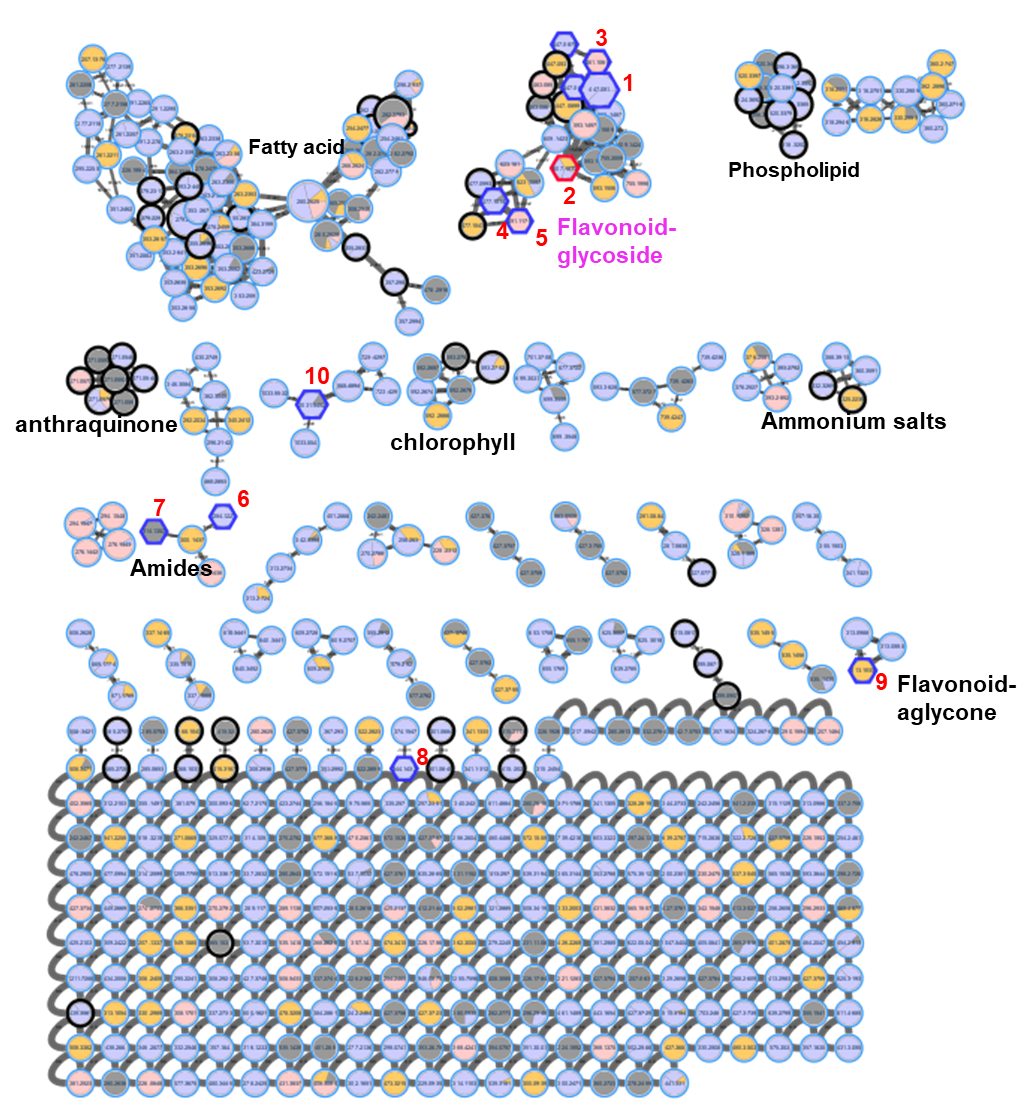


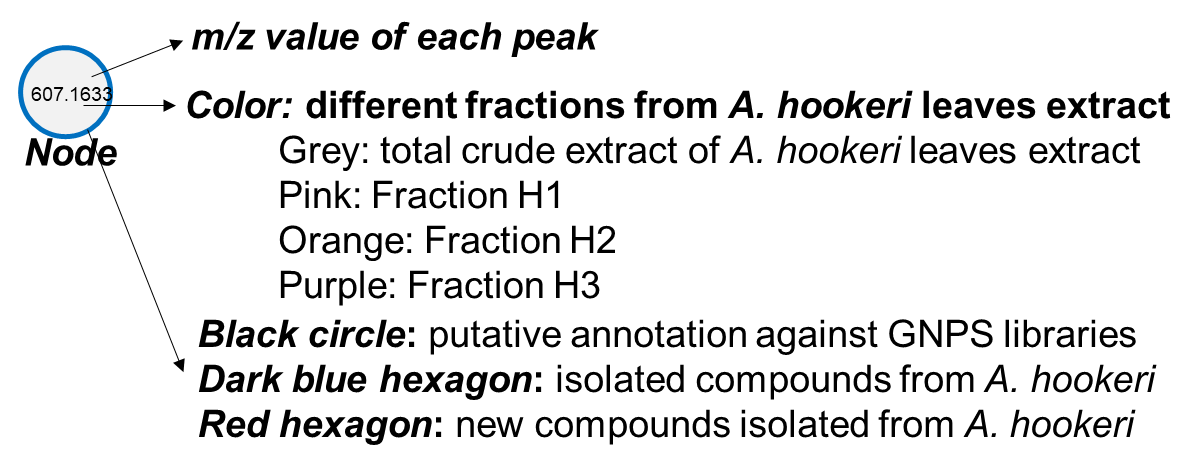


**Figure S3**. Chemical structures of putative identification of components from leaves of *Allium hookeri* using HRESI-qTOF-MS/MS-based molecular networking.

HRESI-qTOF-MS/MS data recorded in positive mode selective for assignment with *m/z* error less than 10 ppm. Details of each compound including retention, *m/z*, *m/z* error, and GNPS link of compound assignment can be found in Table S1. Molecular networking was created at GNPS (<https://gnps.ucsd.edu/ProteoSAFe/status.jsp?task=b6f262ecf9994b82bab562336b008eeb>)

**Figure S4**. Mass/mass fragmentation of triterpenoid cluster in FBMN

| 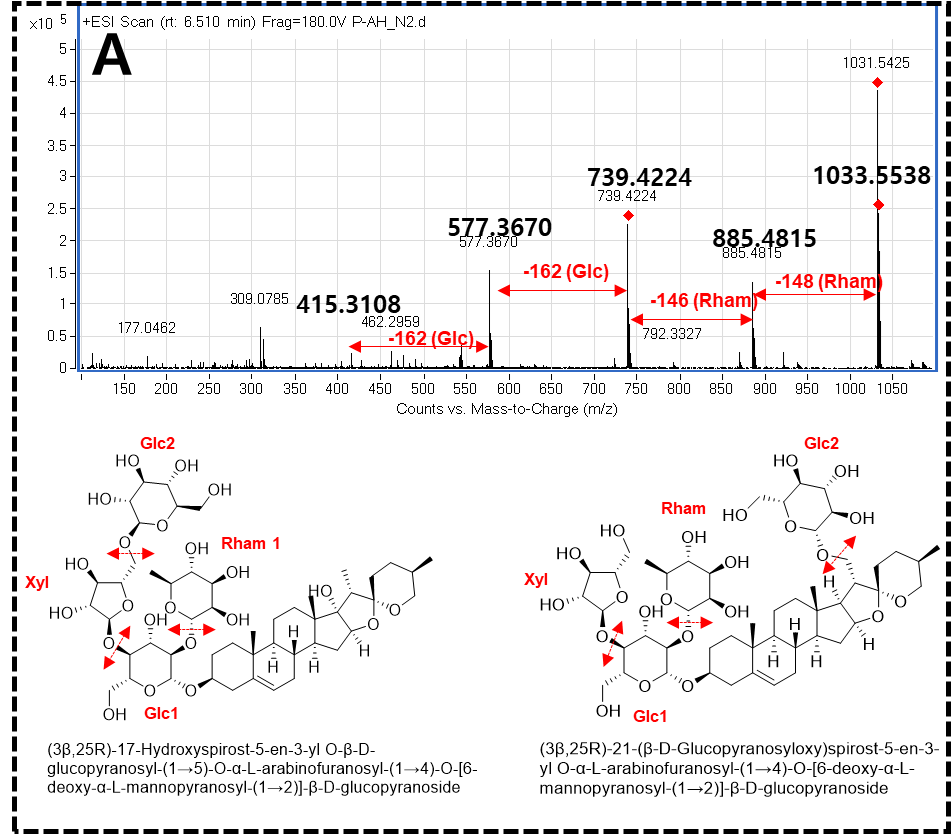 | 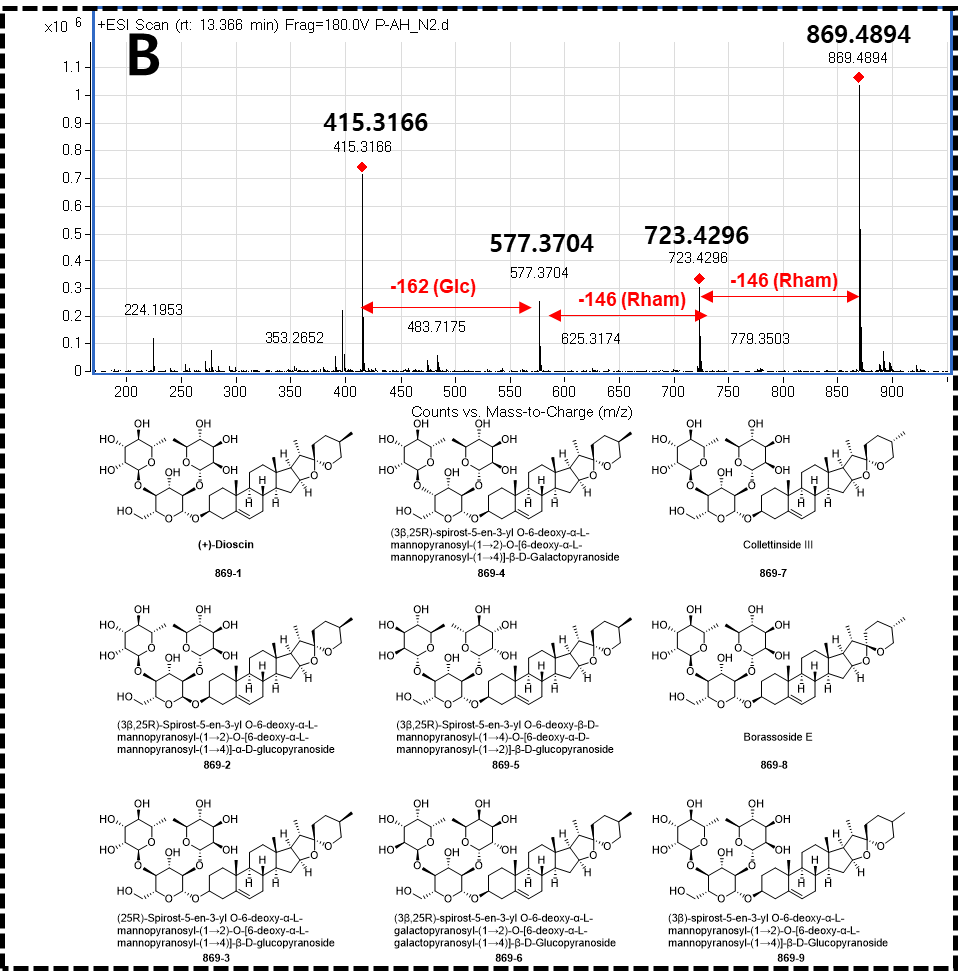 |
| --- | --- |
| 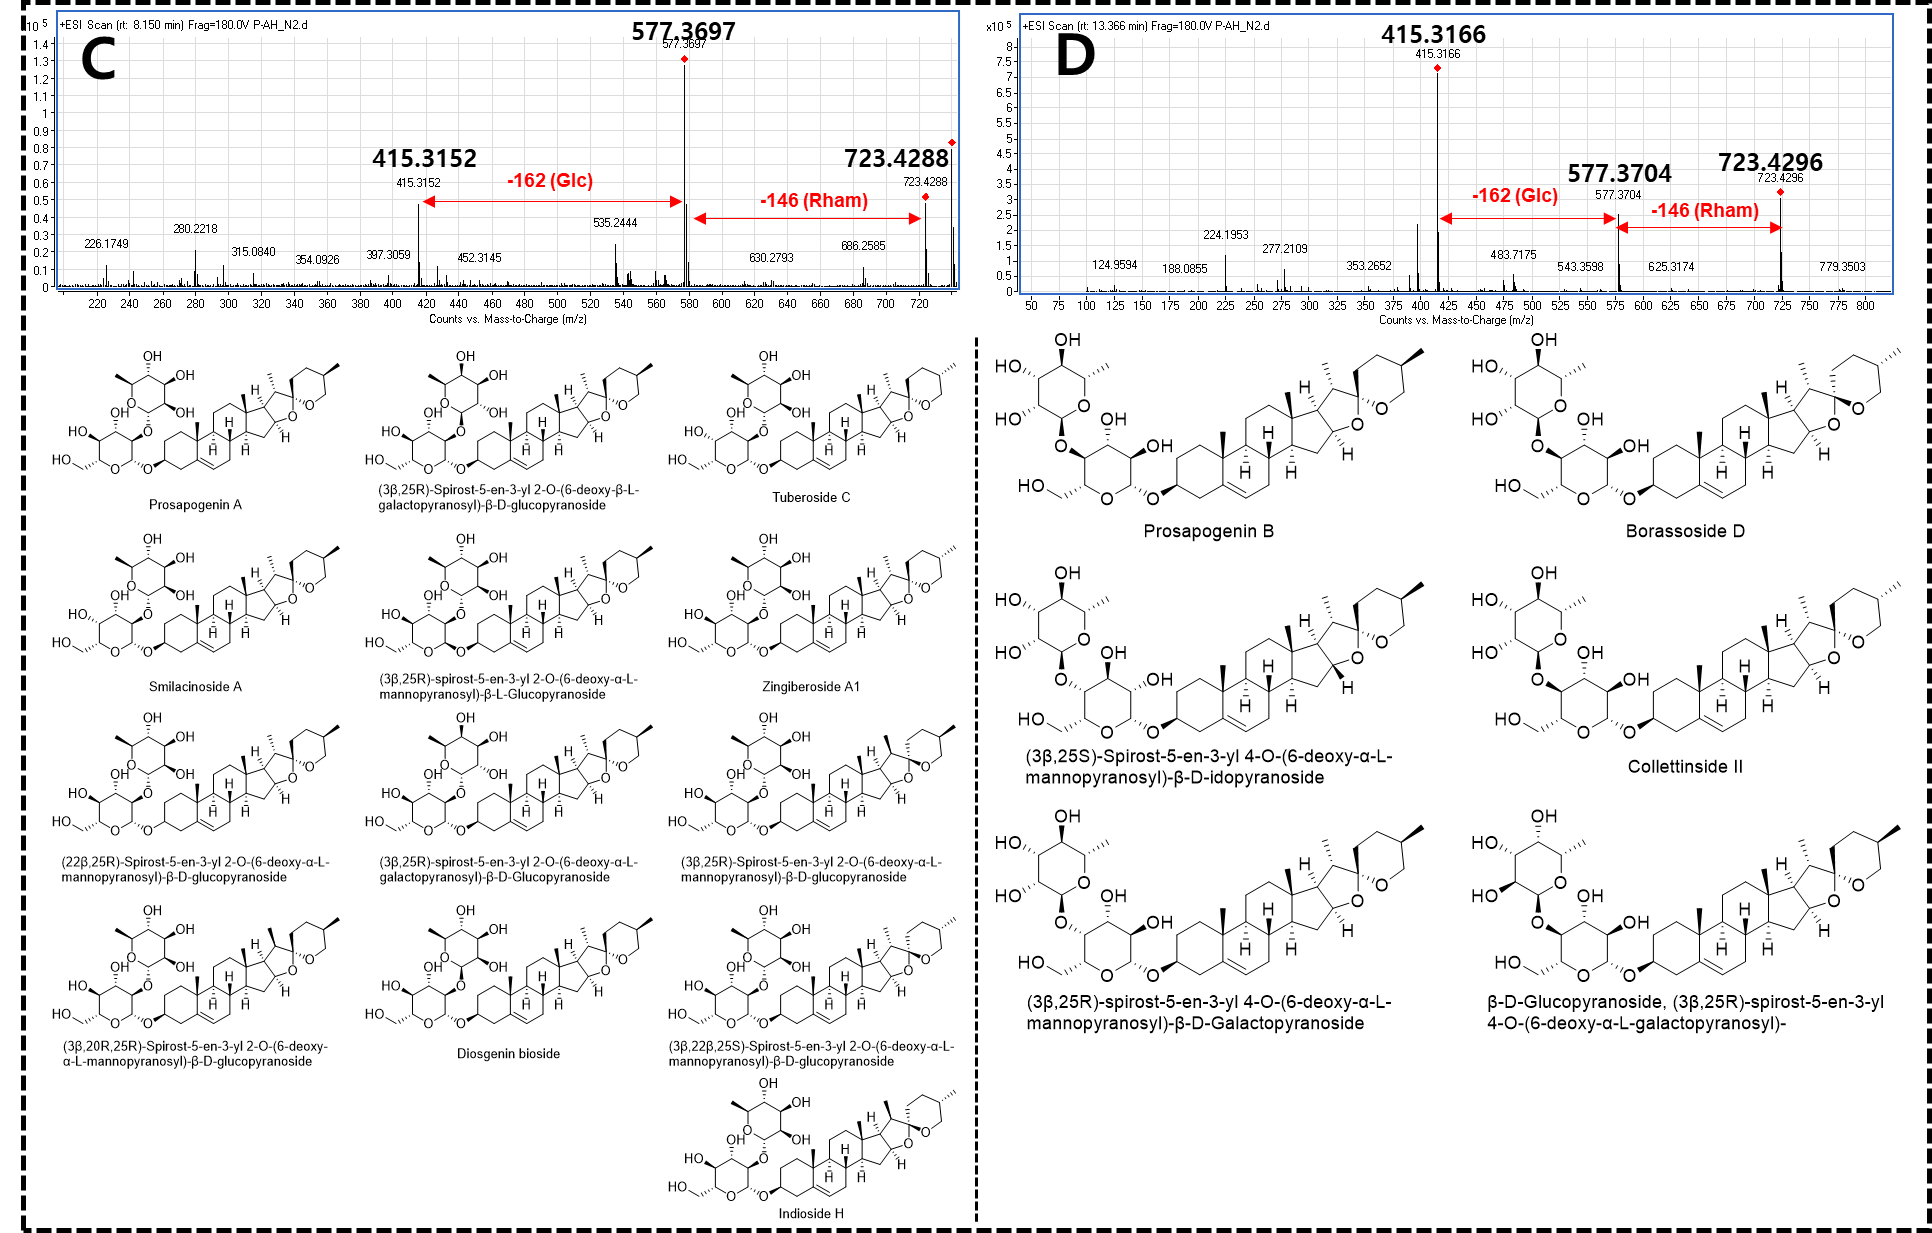 | |

**Figure S5**. HRESIMS data of compound **2**


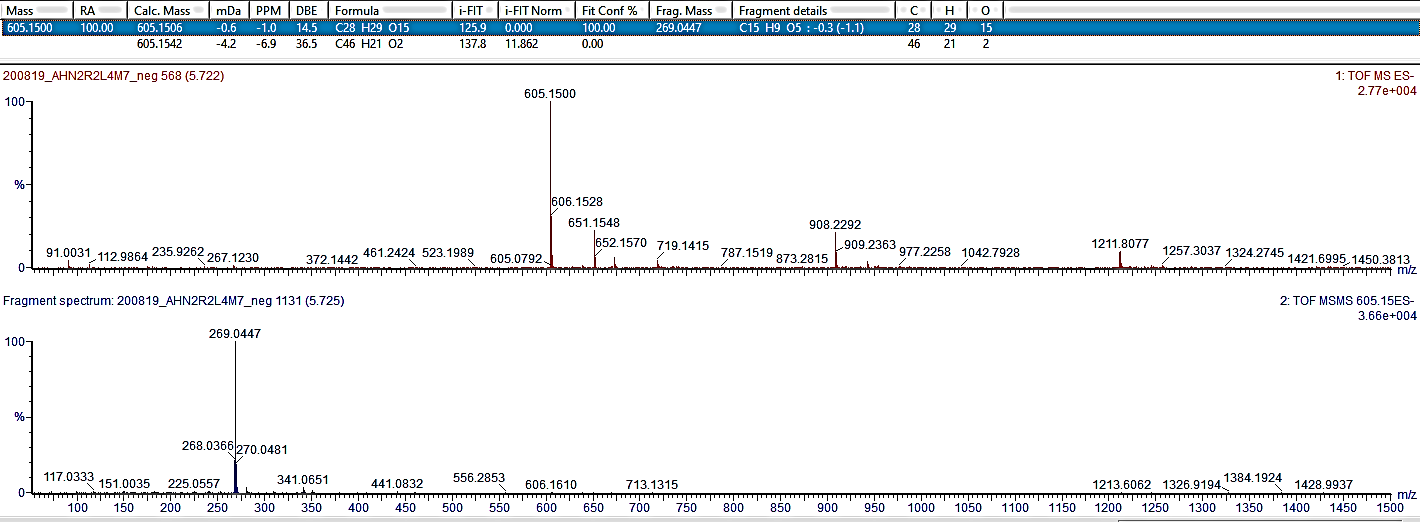


**Figure S6**. IR(KBr) spectrum of compound **2**


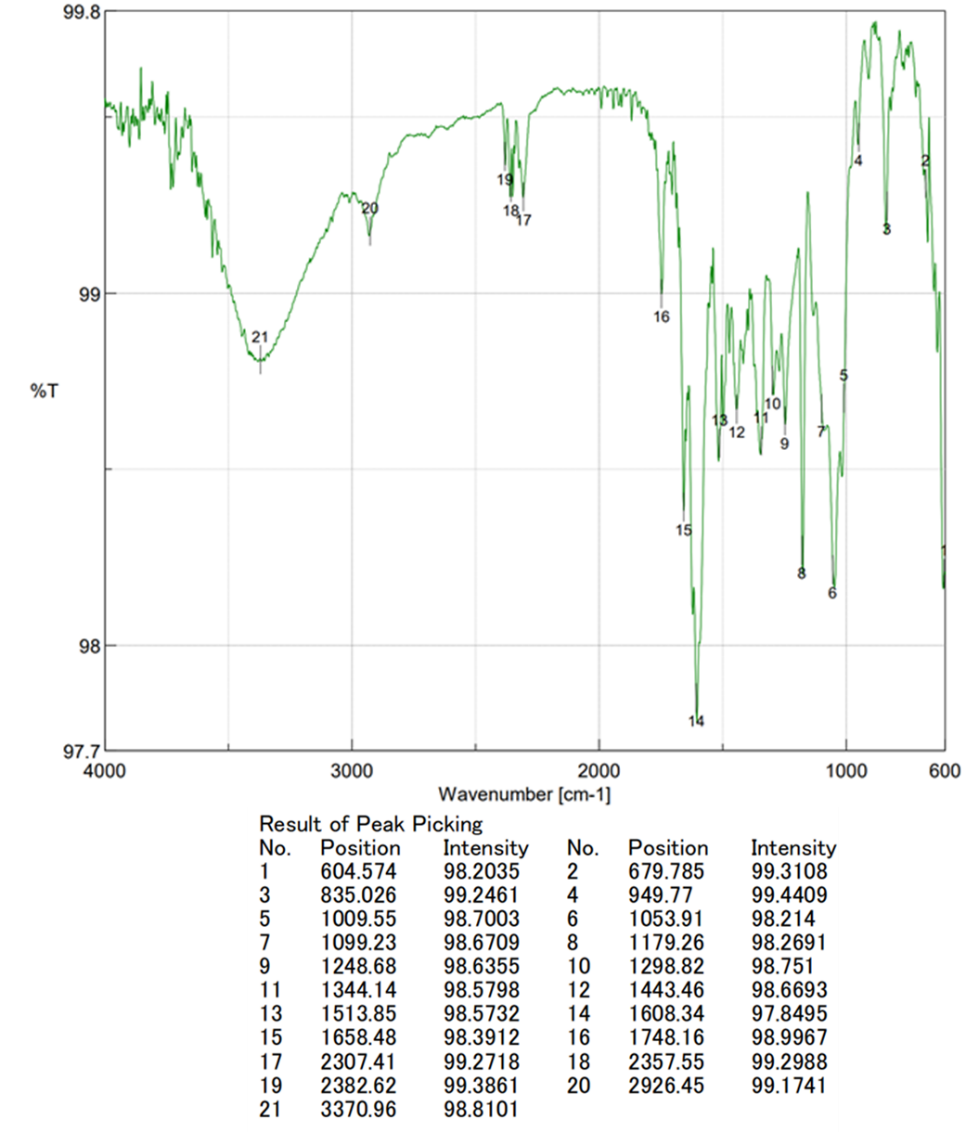


**Figure S7**. 1H NMR spectrum of compound **2** (600 MHz, pyridine-*d*5)


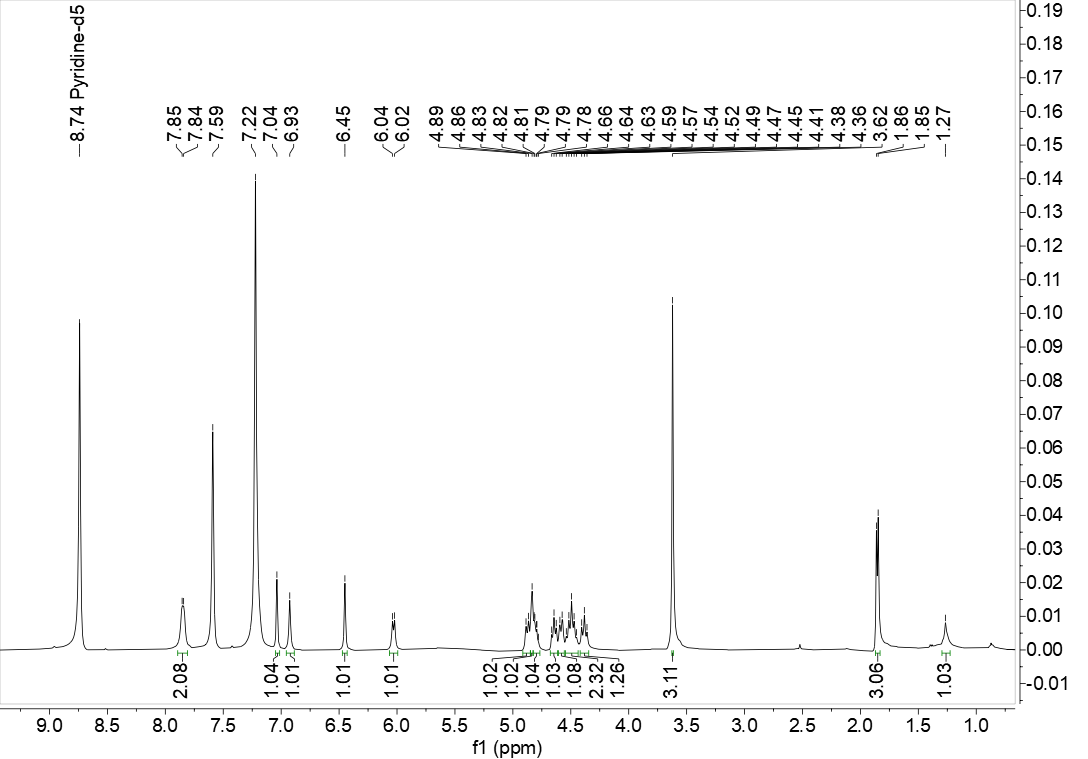


**Figure S8**. 13C NMR spectrum of compound **2** (150 MHz, pyridine-*d*5)

**Figure S9**. HSQC spectrum of compound **2**

**Figure S10**. HMBC spectrum of compound **2**

**Figure S11**. COSY spectrum of compound **2**

**Figure S12**. HRESIMS/MS of compound **1**

**Figure S13**. IR(KBr) spectrum of compound **1**


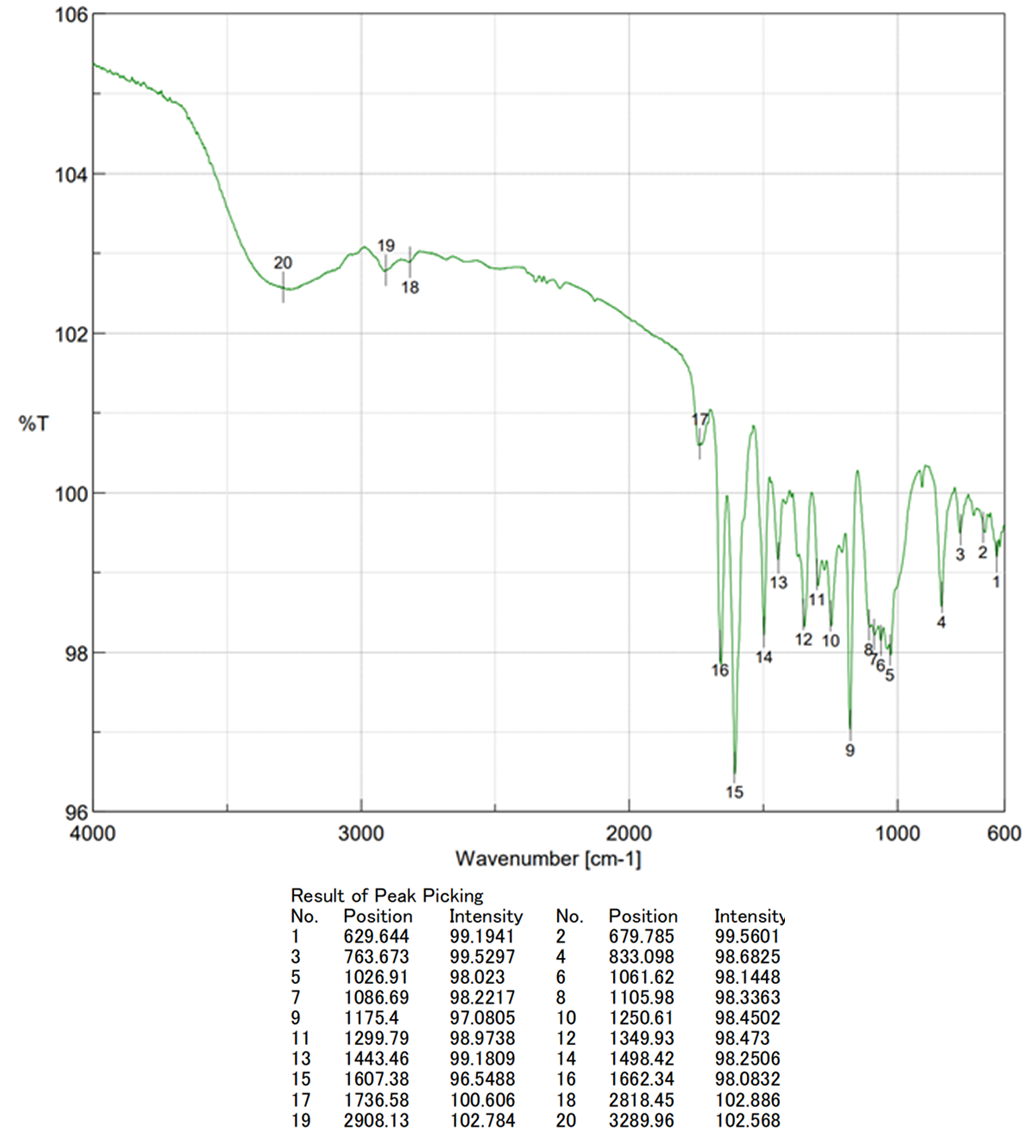


**Figure S14**. 1H NMR spectrum of compound **1** (400 MHz, DMSO-*d*6)


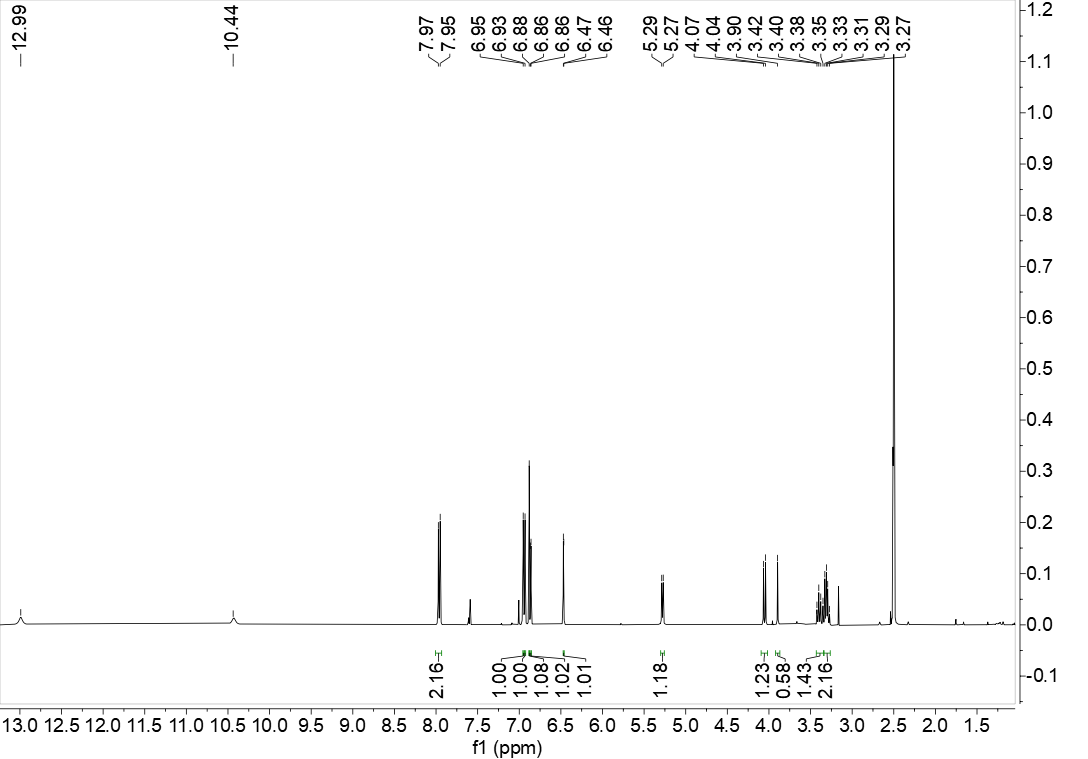


**Figure S15**. HRESIMS/MS of compound **3**

**Figure S16.** IR(KBr) spectrum of compound **3**


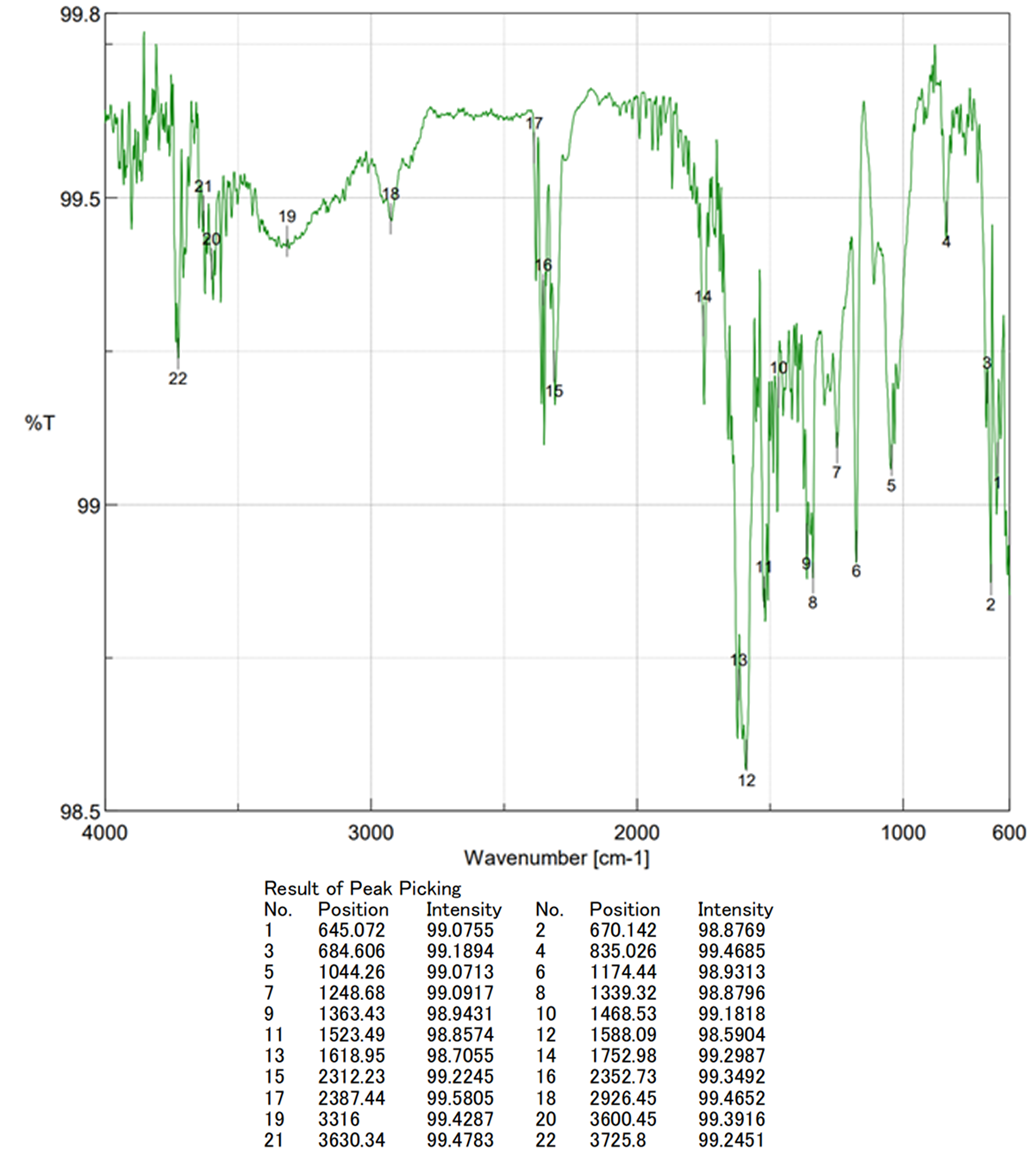


**Figure S17**. 1H NMR spectrum of compound **3** (600 MHz, DMSO-*d*6)


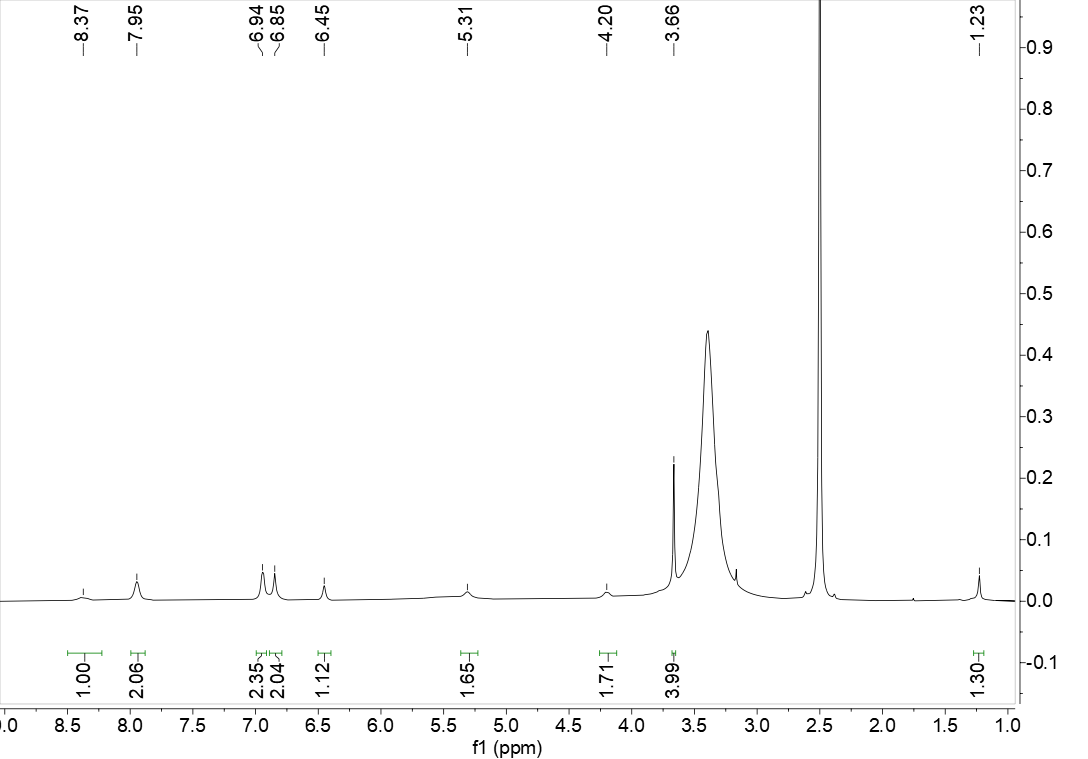


**Figure S18**. 13C NMR spectrum of compound **3** (150 MHz, DMSO-*d*6)

**
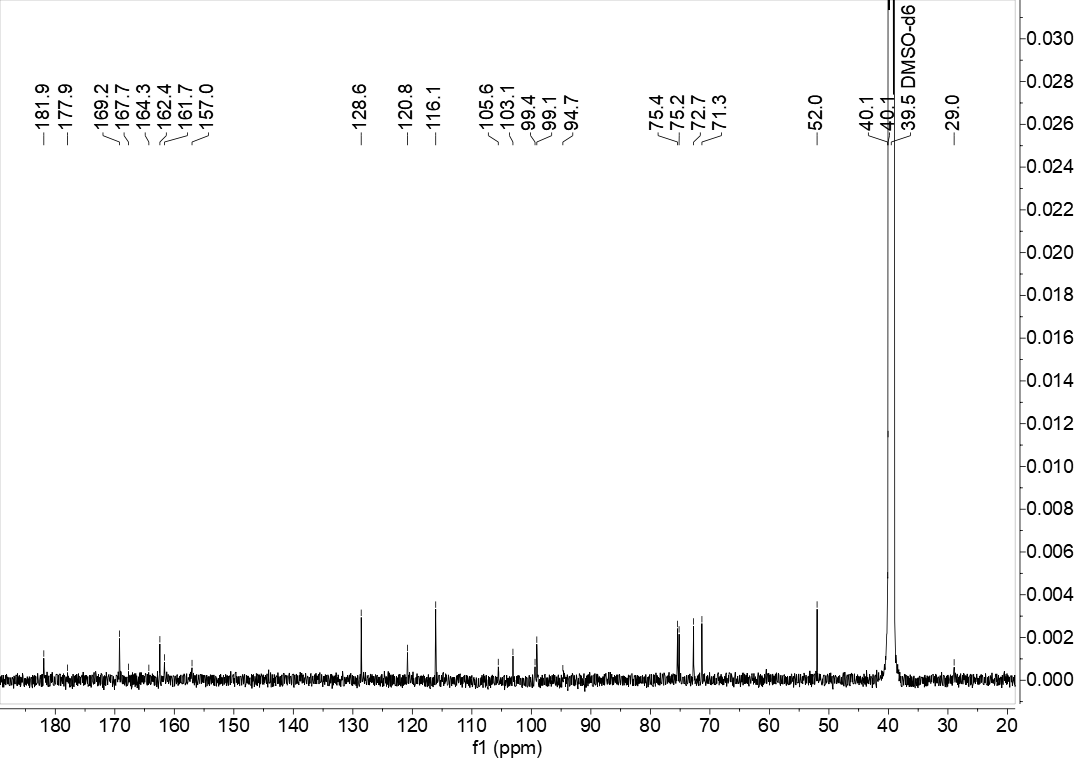
**

**Figure S19**. HRESIMS data of compound **4**


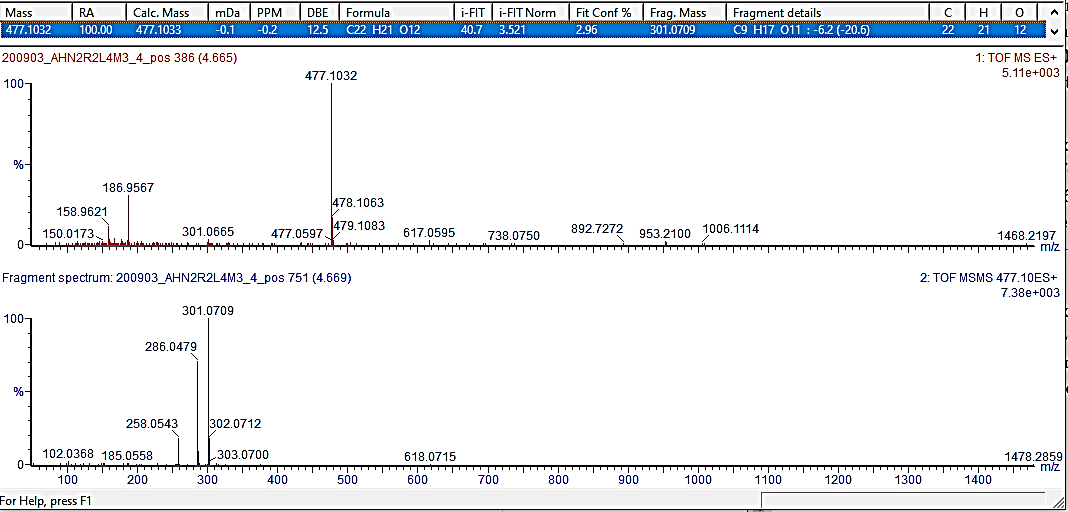


**Figure S20**. UV spectrum of compound **4**


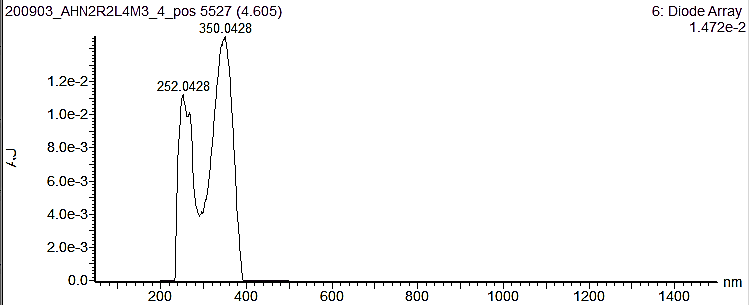


**Figure S21**. IR(KBr) spectrum of compound **4**


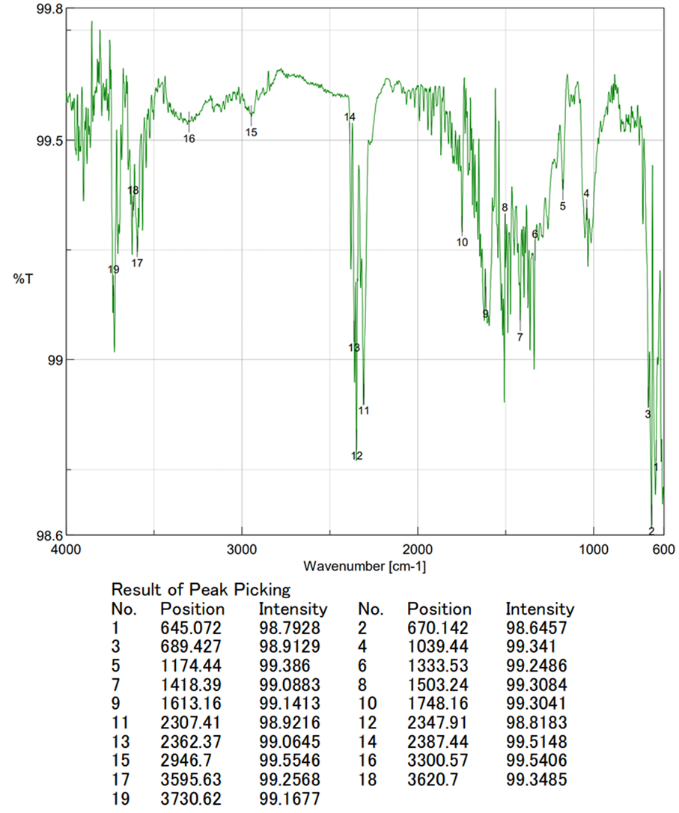


**Figure S22.** 1H NMR spectrum of compound **4** (500MHz, DMSO-*d*6)

**
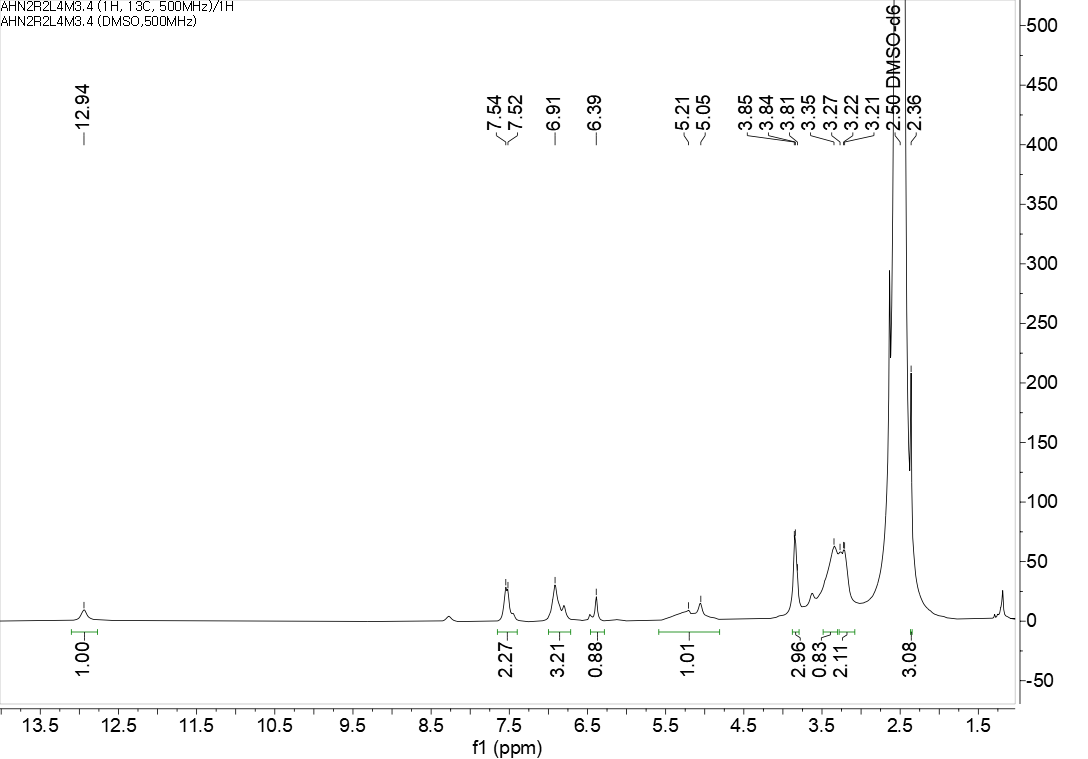
**

**Figure S23**. 13C NMR spectrum of compound **4** (125 MHz, DMSO-*d*6)

**
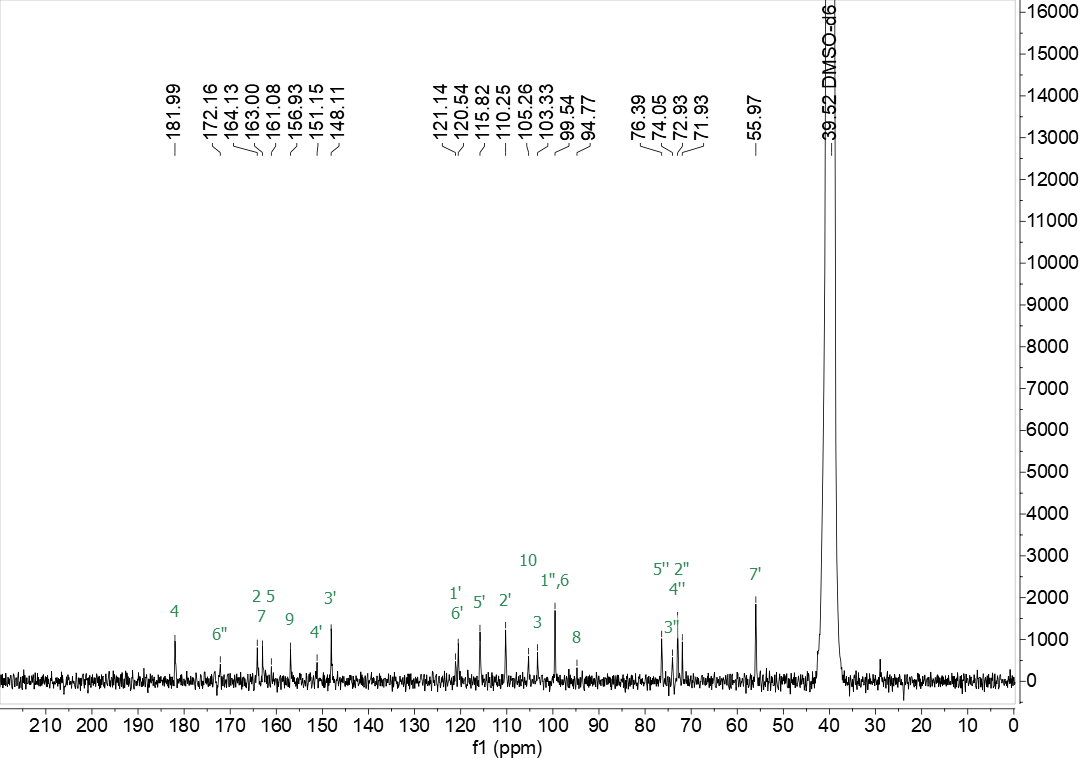
**

**Figure S24**. HRESIMS data of compound **5**


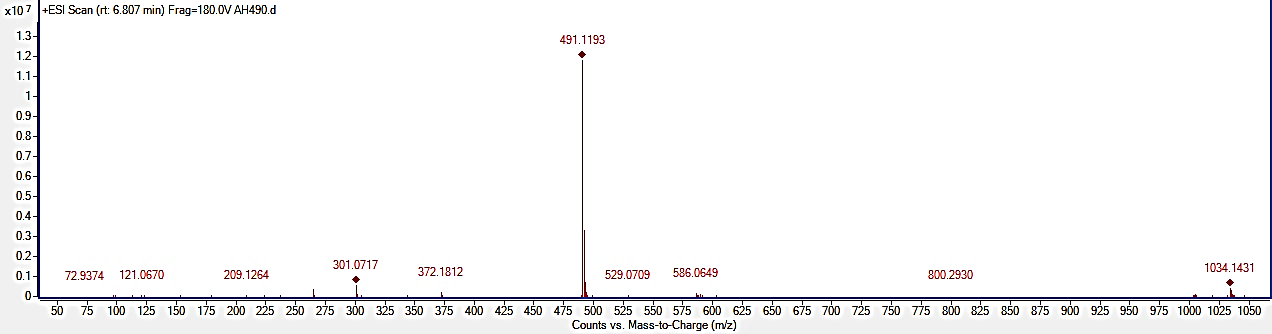


**Figure S25**. UV spectrum of compound **5**


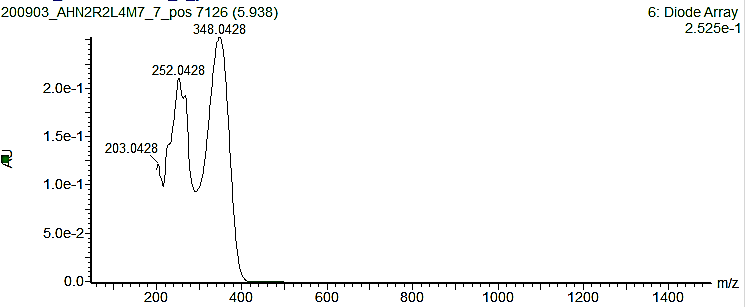


**Figure S26**. IR(KBr) spectrum of compound **5**


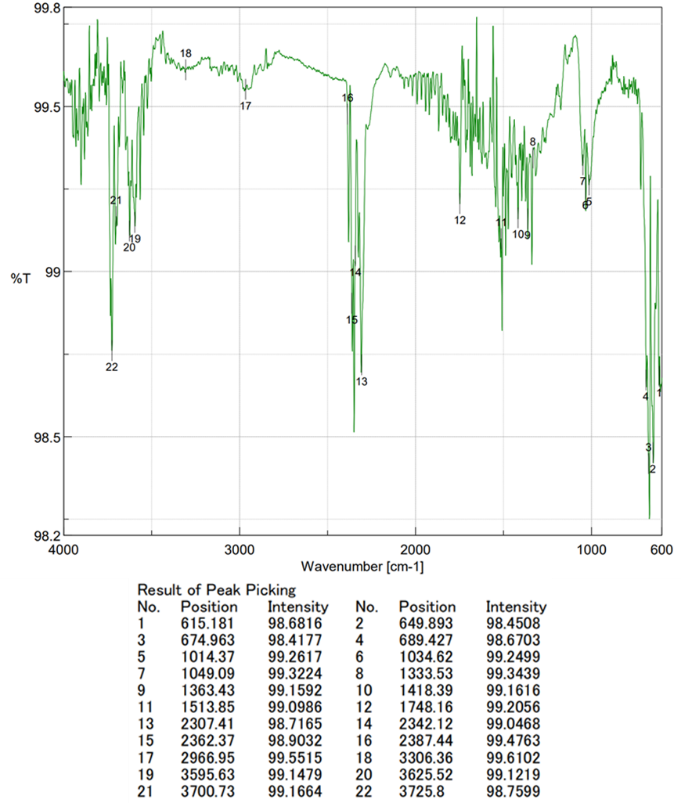


**Figure S27**. 1H NMR spectrum of compound **5** (600 MHz, DMSO-*d*6)

**
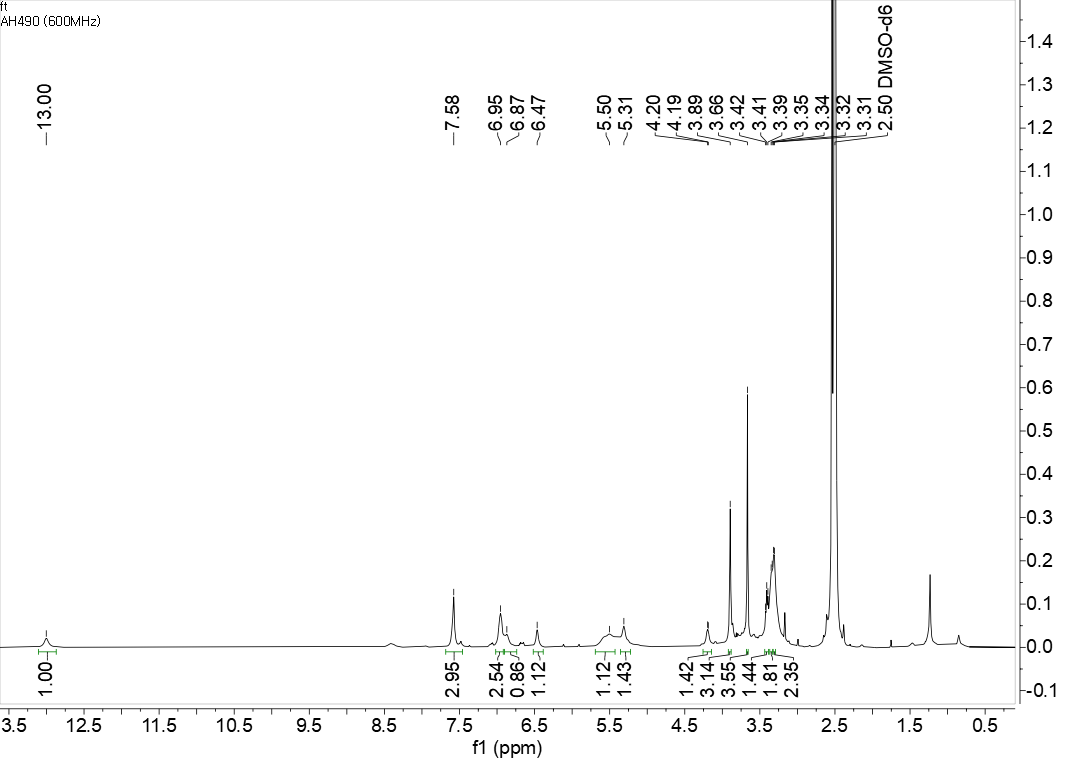
**

**Figure S28**. 13C NMR spectrum of compound **5** (150 MHz, DMSO-*d*6)

**
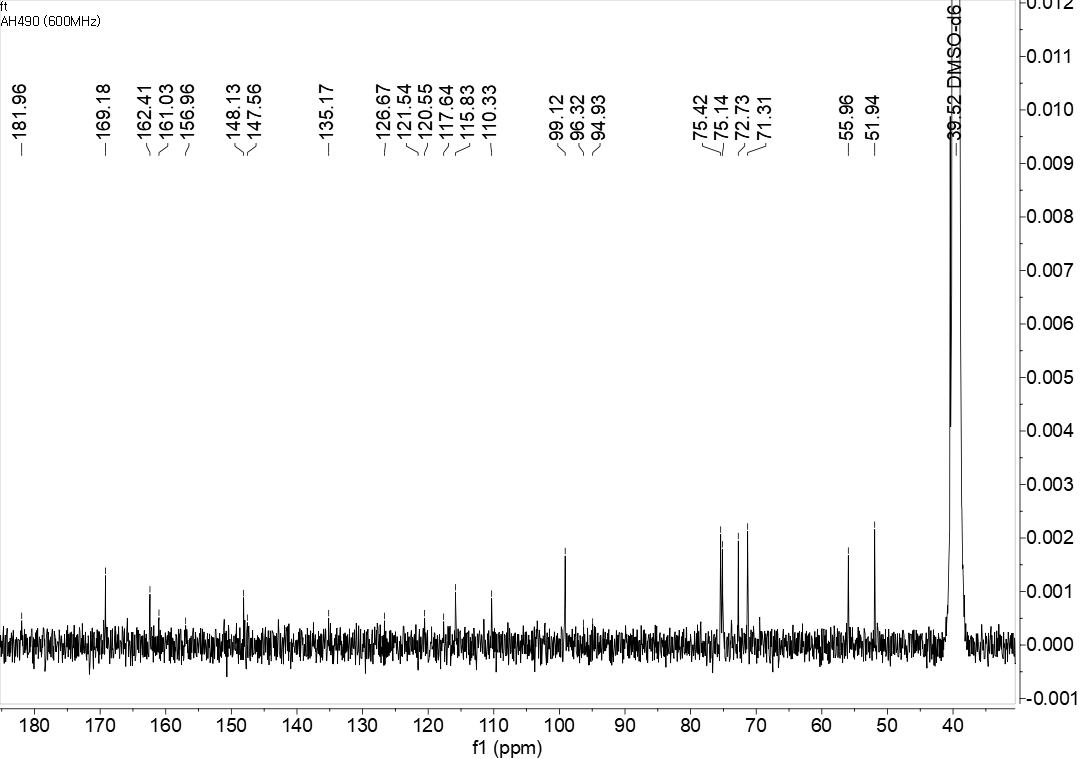
**

**Figure S29**. HRESIMS data of compound **6**

**Figure S30**. IR(KBr) spectrum of compound **6**


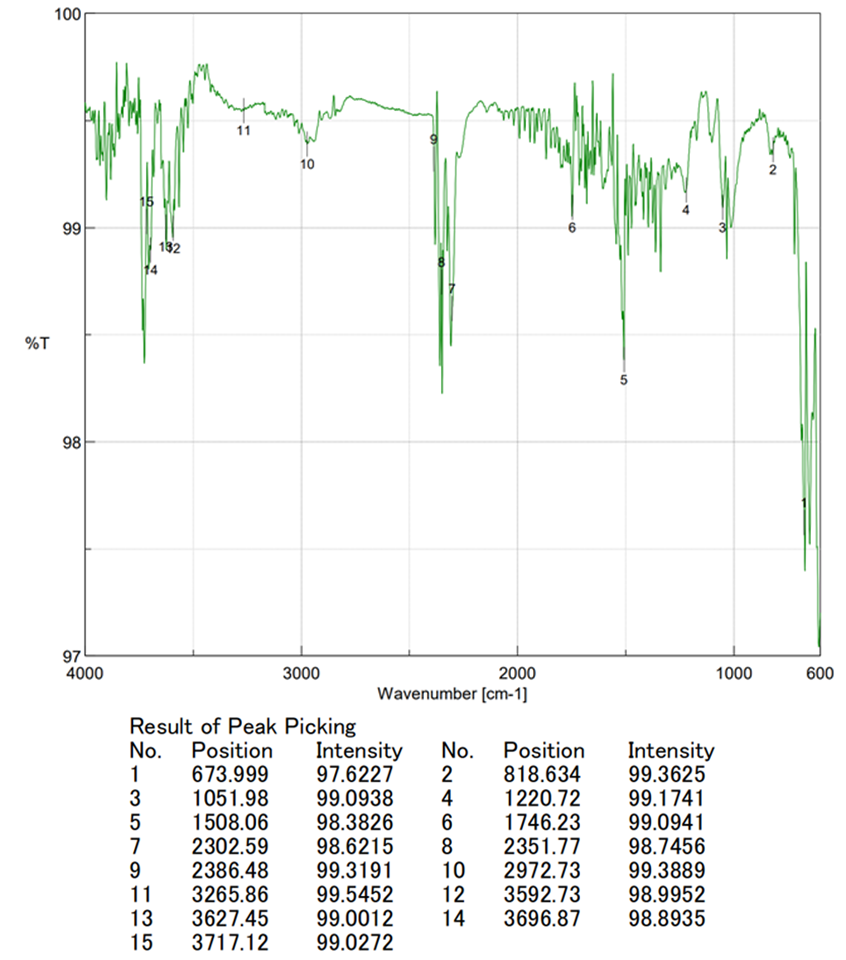


**Figure S31**. 1H NMR spectrum of compound **6** (500 MHz, DMSO-*d*6)

**
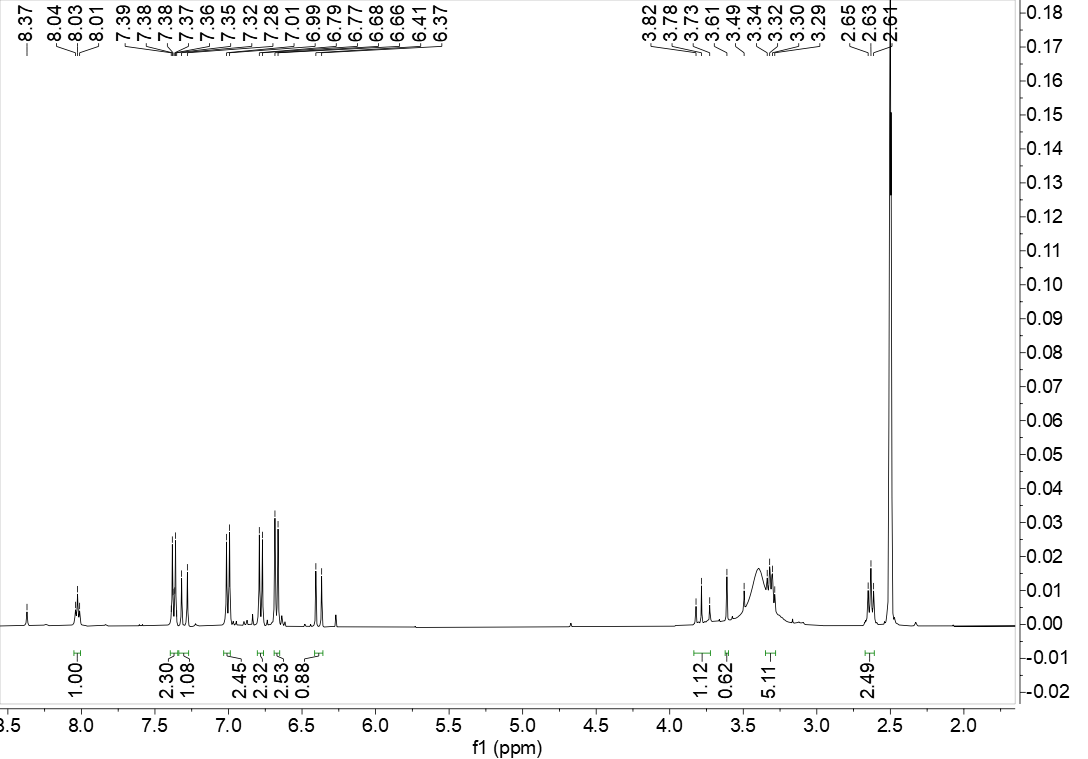
**

**Figure S32**. 13C NMR spectrum of compound **6** (125 MHz, DMSO-*d*6)


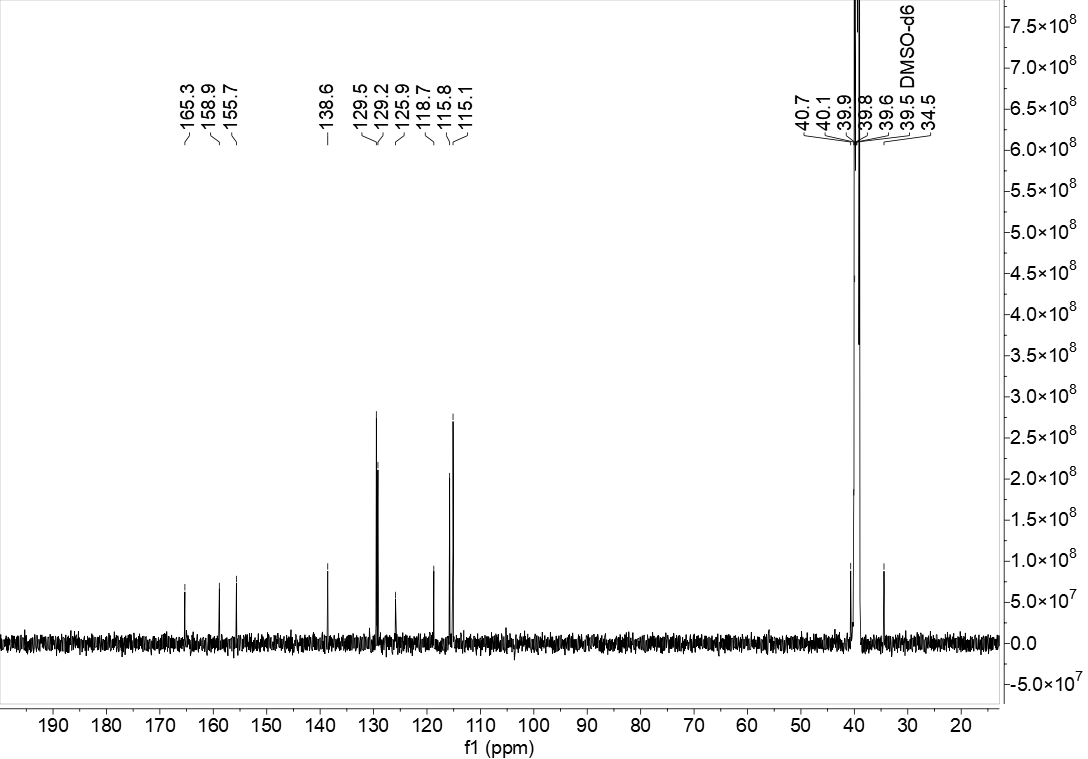


**Figure S33**. HRESIMS data of compound **7**

**Figure S34**. IR(KBr) spectrum of compound **7**


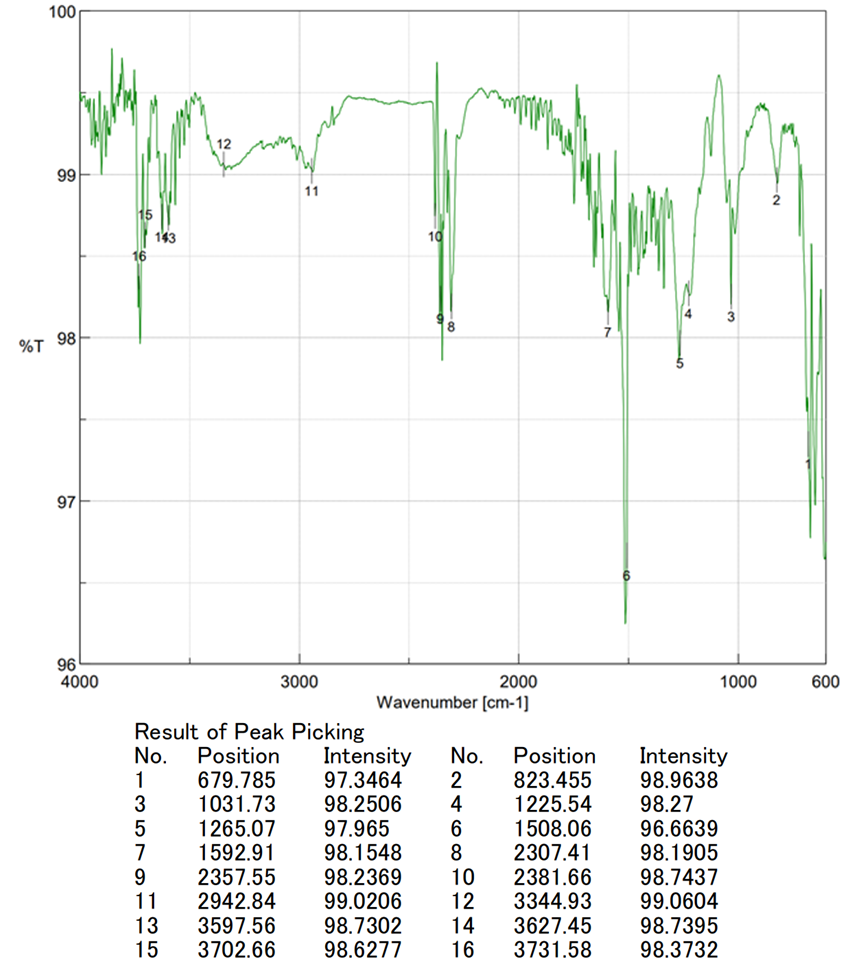


**Figure S35**. 1H NMR spectrum of compound **7** (400 MHz, DMSO-*d*6)


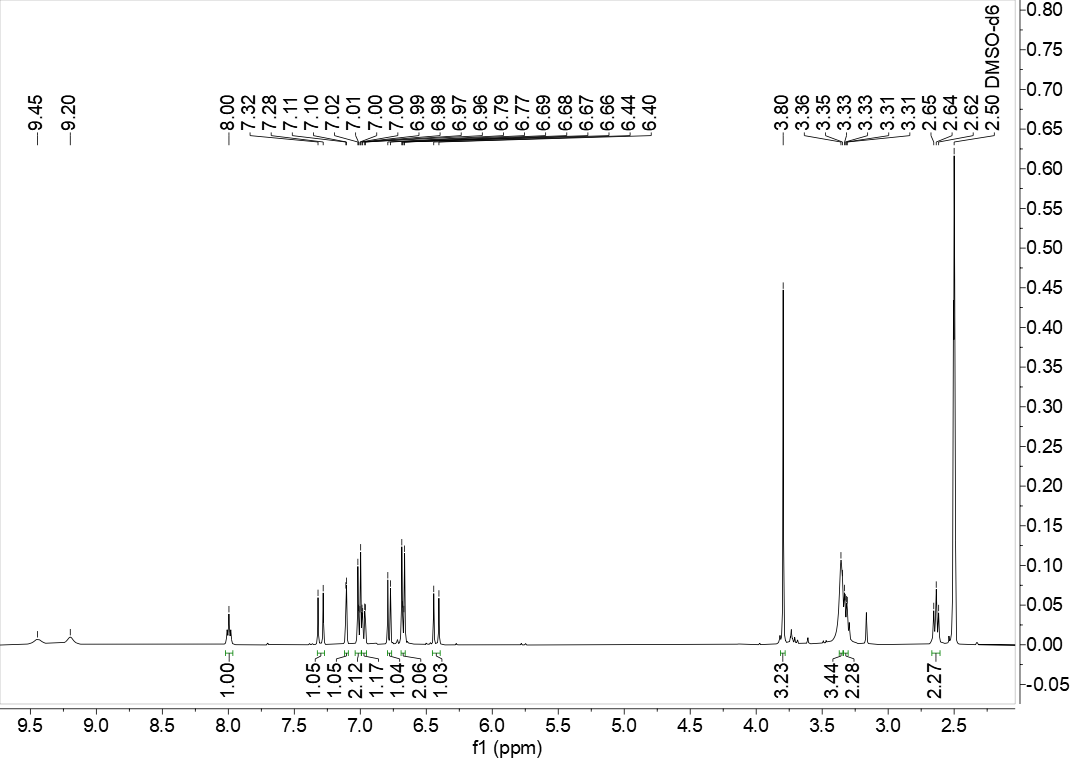


**Figure S36**. 13C NMR spectrum of compound **7** (100 MHz, DMSO-*d*6)


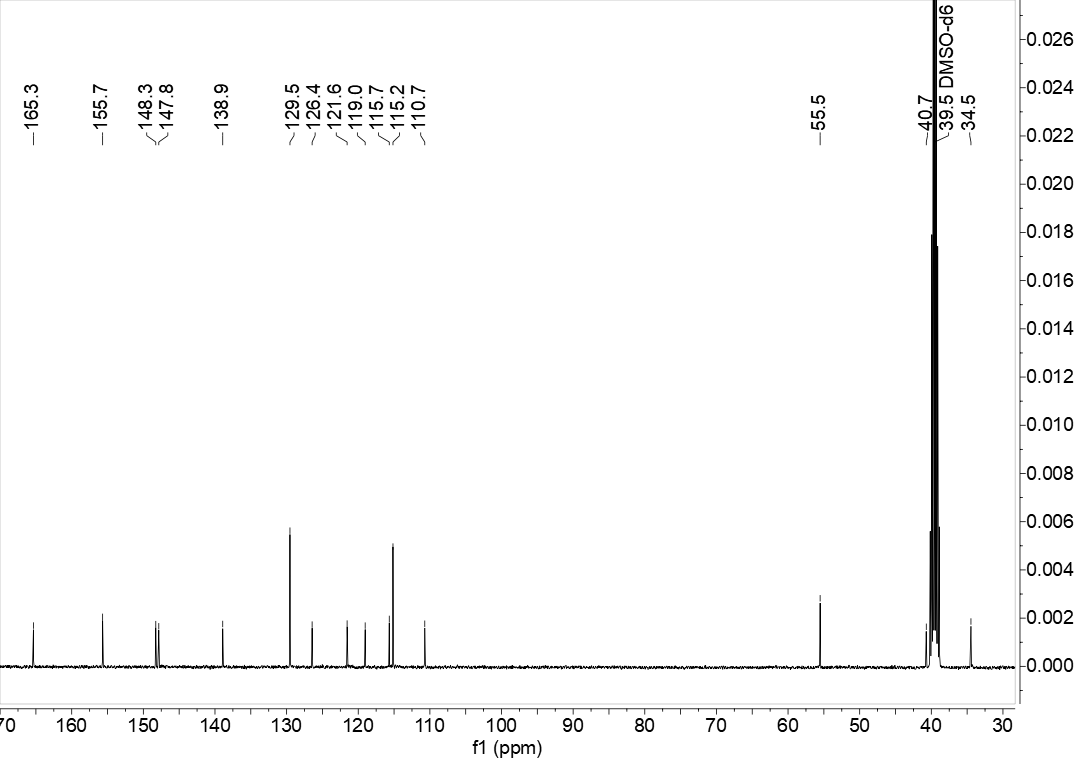


**Figure S37**. HRESIMS data of compound **8**

**Figure S38**. UV spectrum of compound **8**


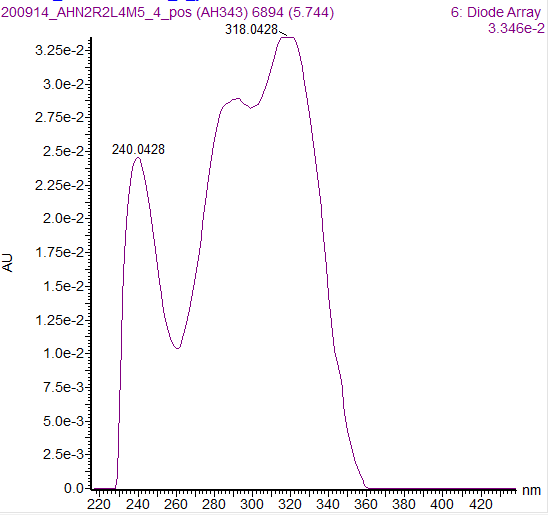


**Figure S39**. IR(KBr) spectrum of compound **8**


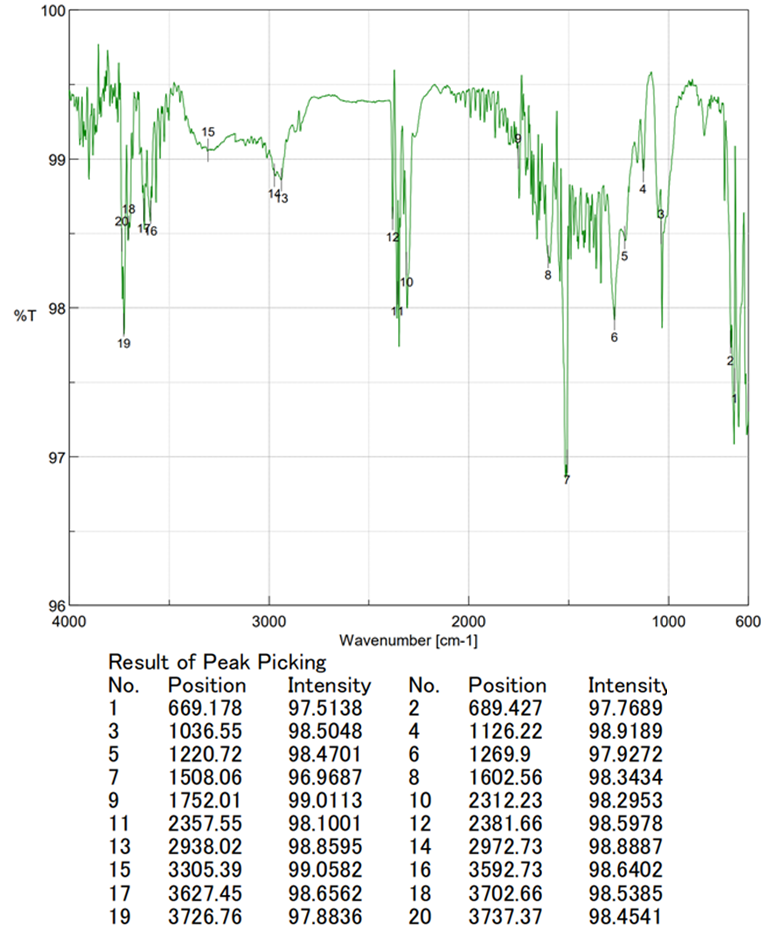


**Figure S40**. 1H NMR spectrum of compound **8** (600 MHz, DMSO-*d*6)


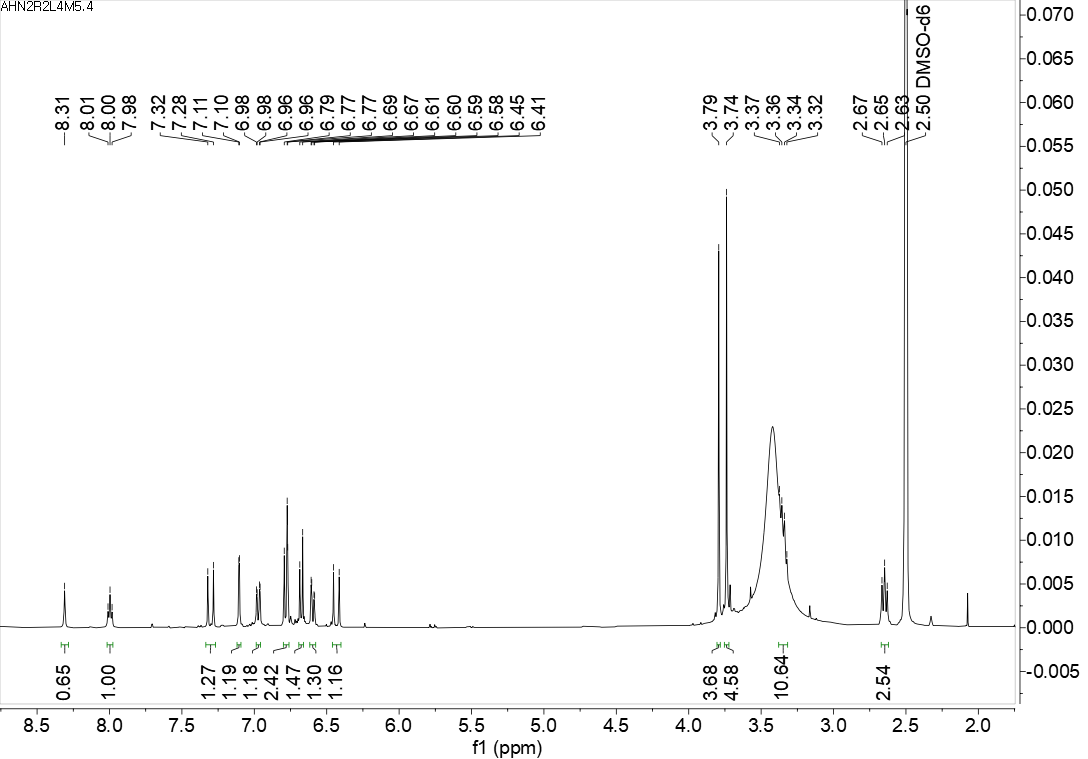


**Figure S41**. 13C NMR spectrum of compound **8** (150 MHz, DMSO-*d*6)


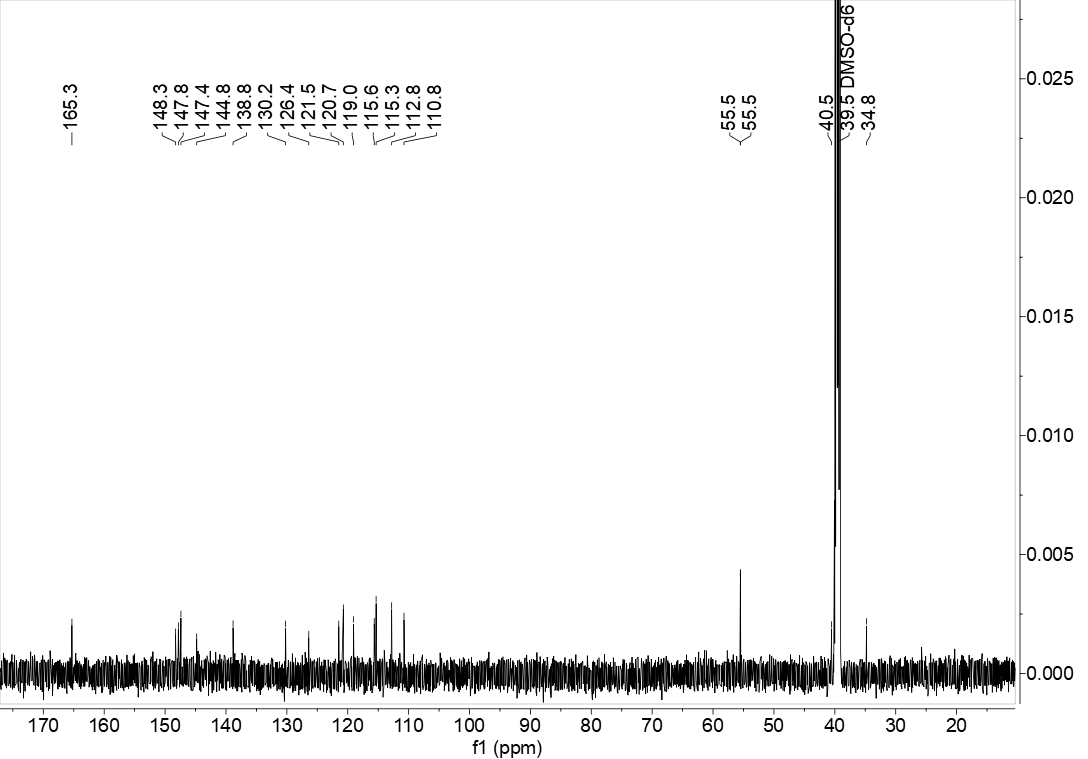


**Figure S42**. HRESIMS/MS data of compound **9**


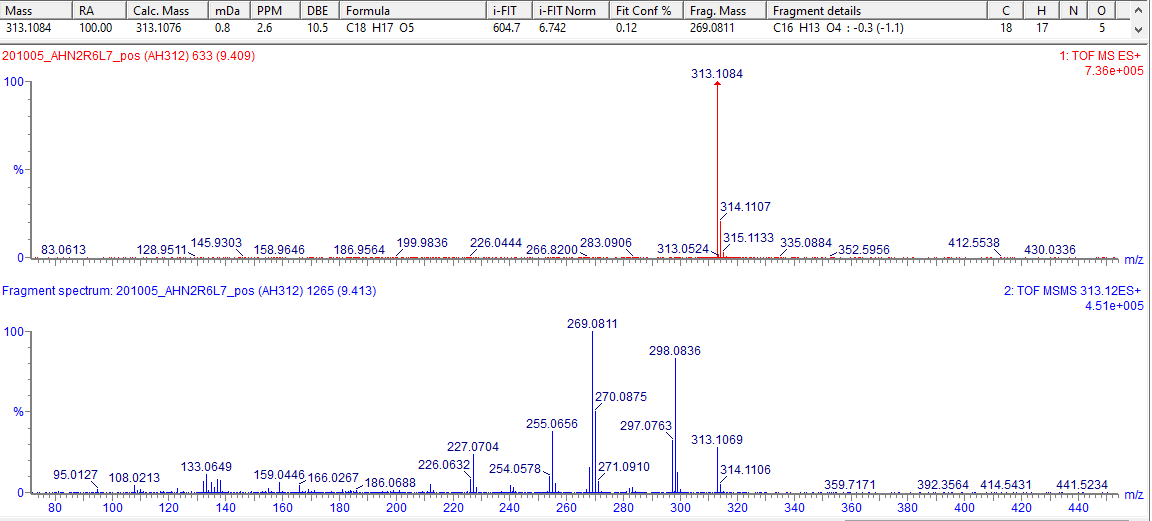


**Figure S43**. UV spectrum of compound **9**


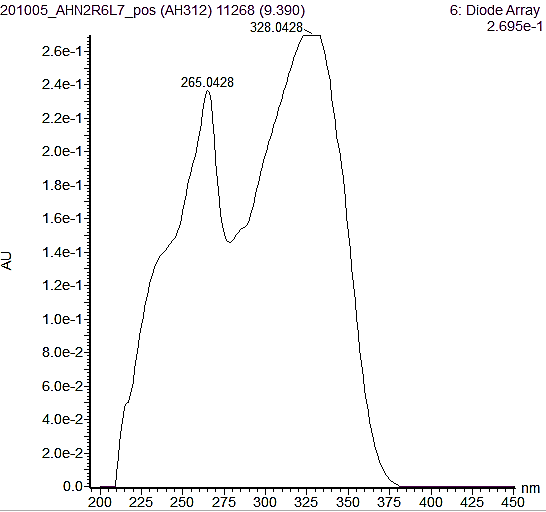


**Figure S44**. IR(KBr) spectrum of compound **9**


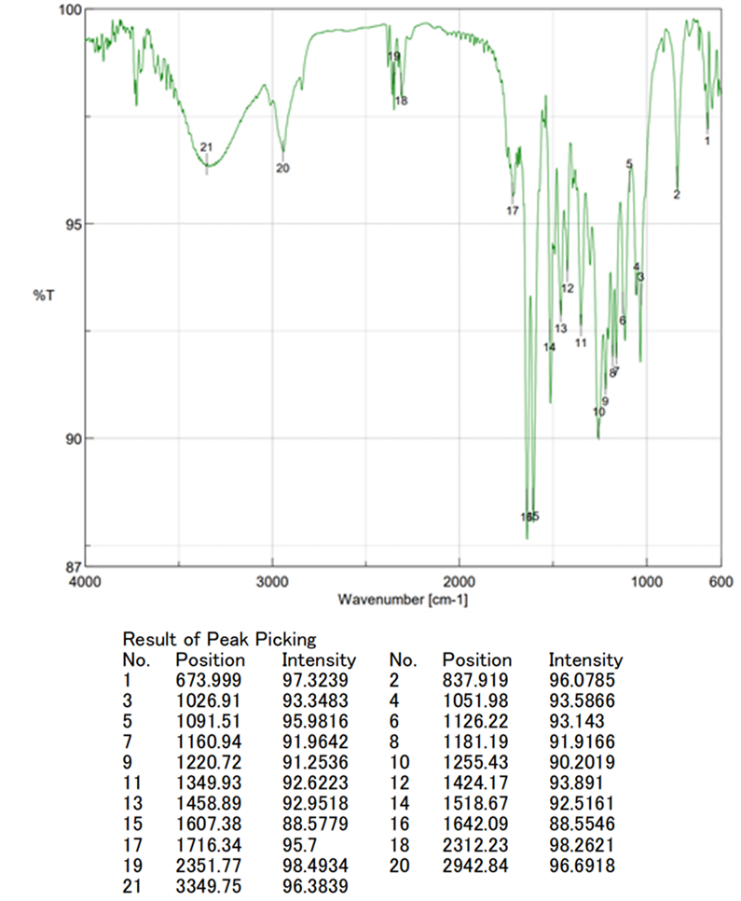


**Figure S45**. 1H NMR spectrum of compound **9** (600 MHz, DMSO-*d*6)


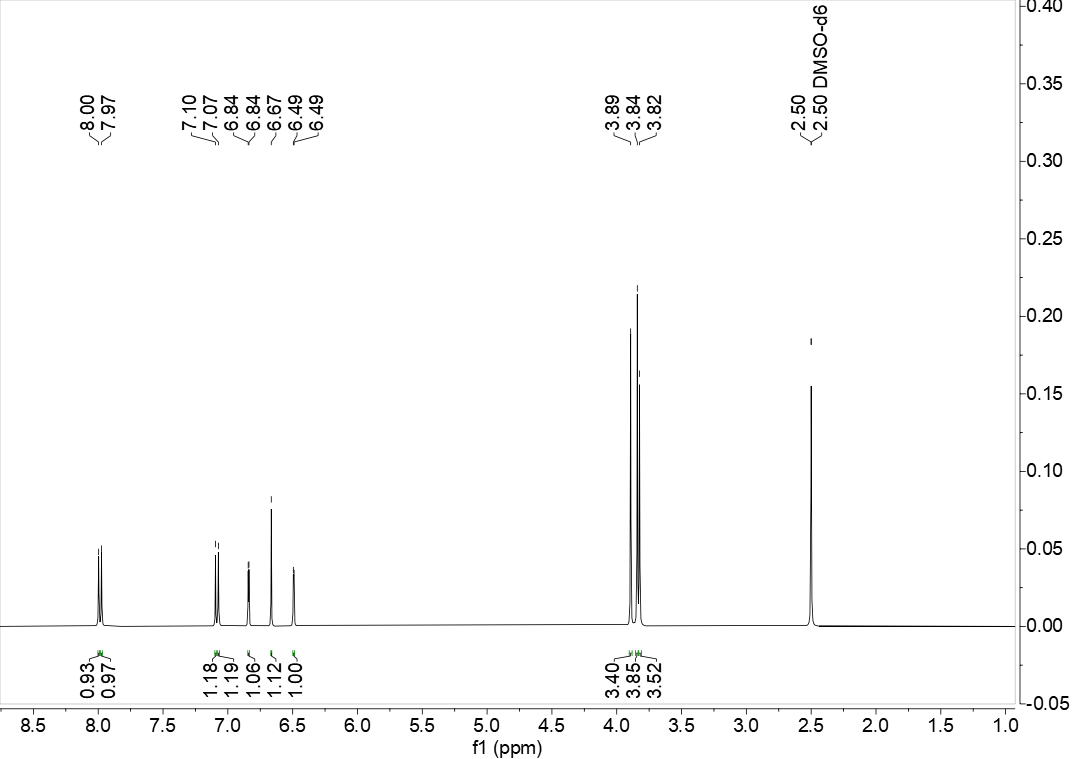


**Figure S46**. 13C NMR spectrum of compound **9** (150 MHz, DMSO-*d*6)


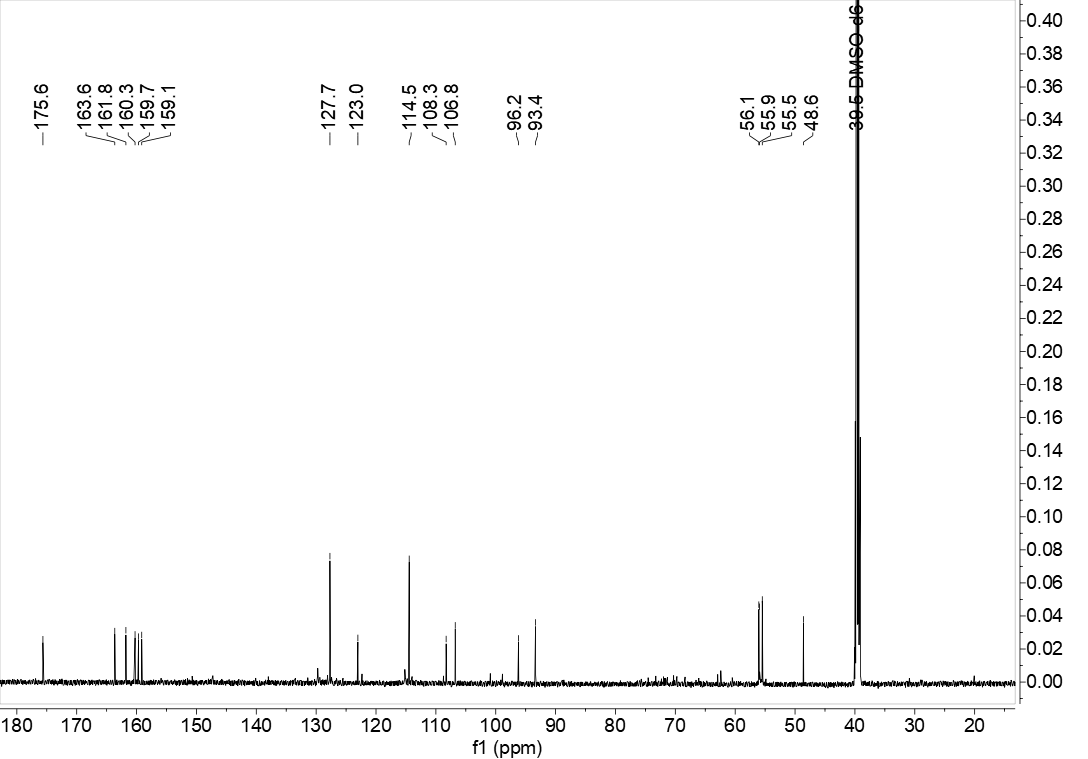


**Figure S47**. HRESIMS/MS data of compound **10**

**Figure S48**. IR(KBr) spectrum of compound **10**


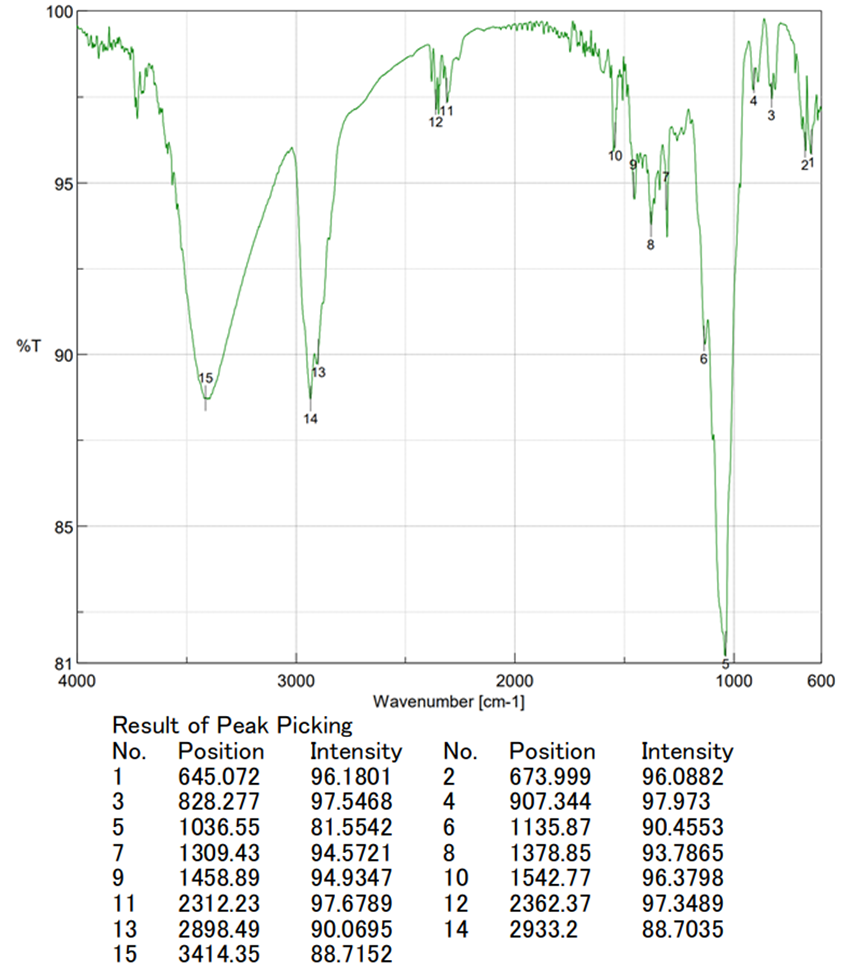


**Figure S49**. 1H NMR spectrum of compound **10** (500 MHz, pyridine-*d*5)


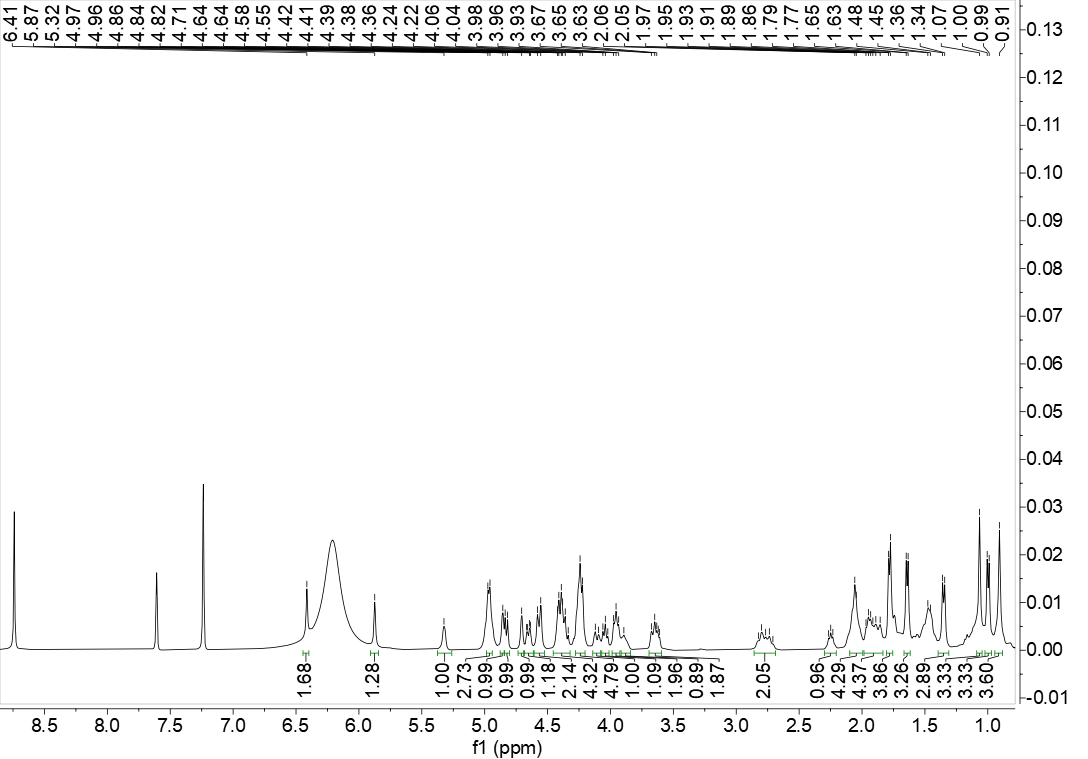


**Figure S50**. 13C NMR spectrum of compound **10** (125 MHz, pyridine-*d*5)


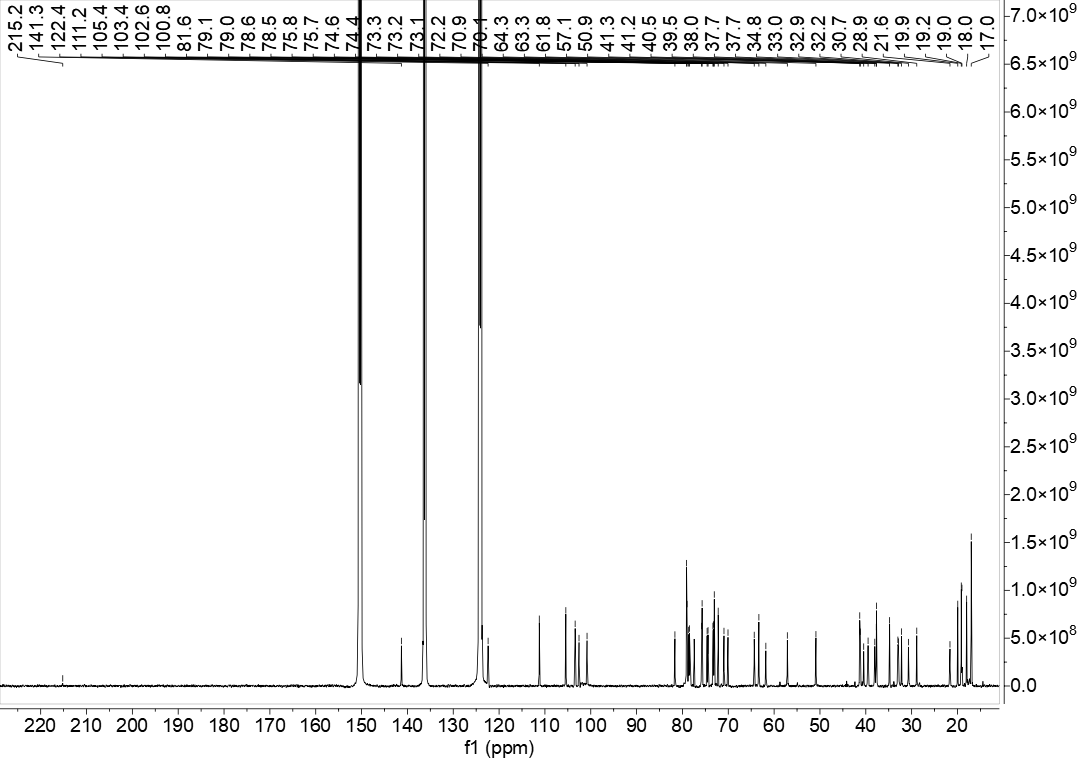


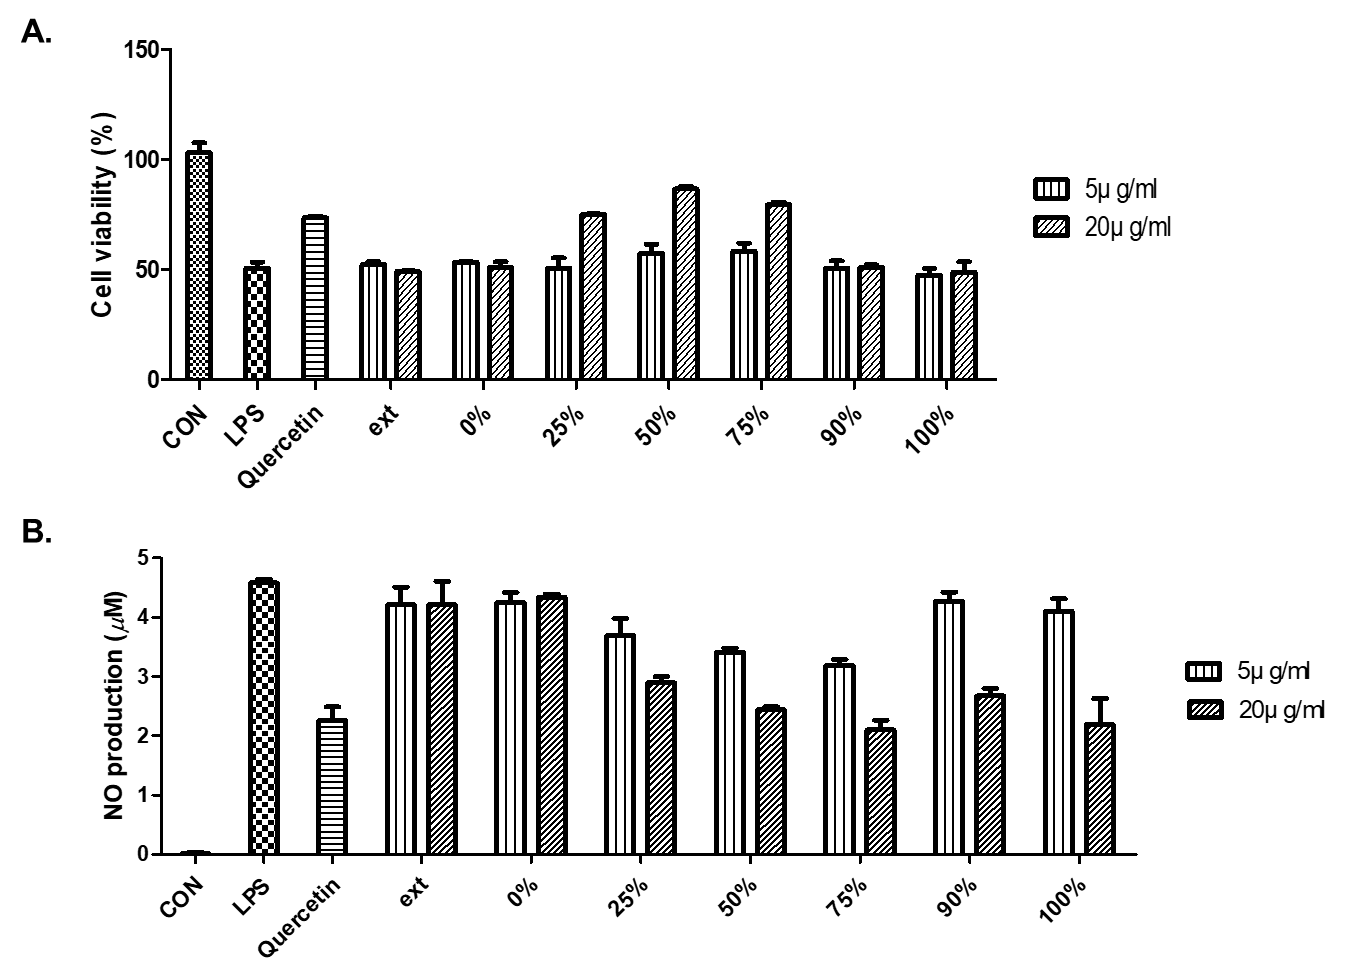


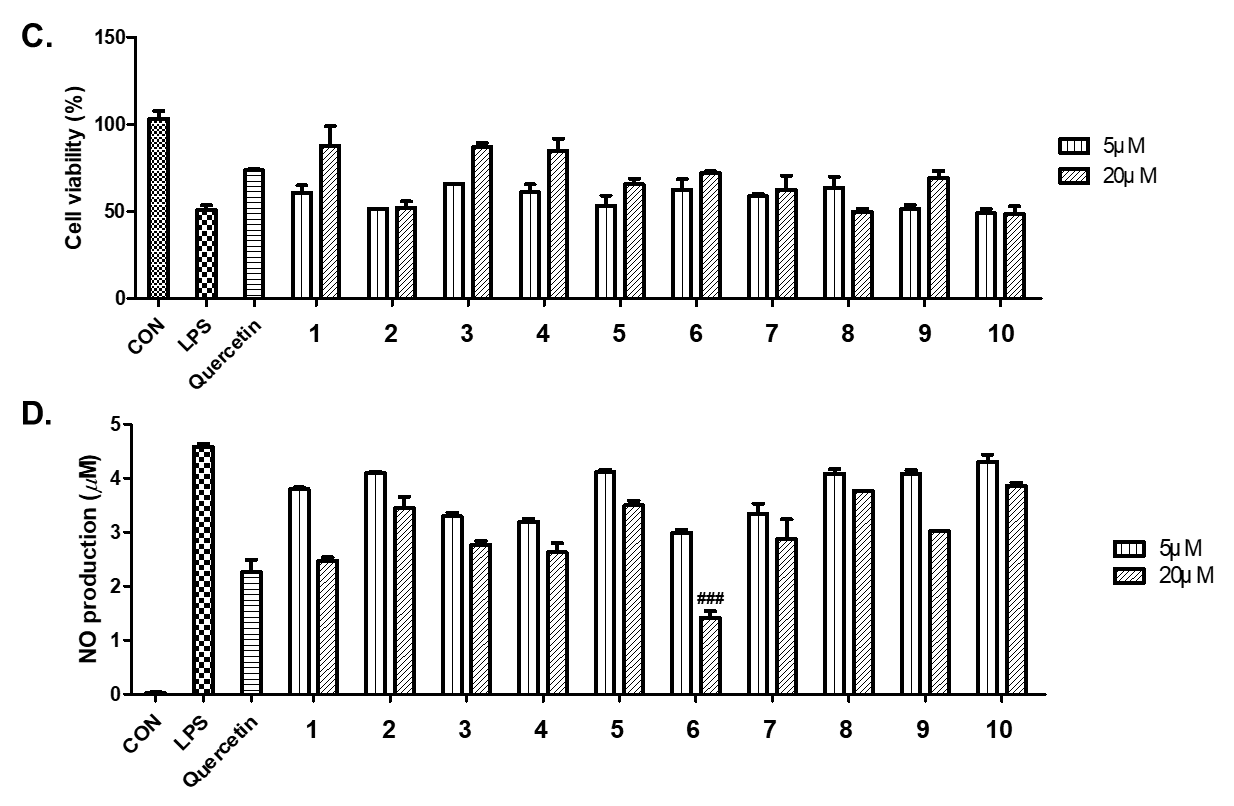


**Figure S51**. Inhibitory effects of fractions and single compounds from *A. hookeri* on BLM-induced senescence system in RAW 264.7 cells using nitric oxide (NO) assay kit.

1. Cell viability of total extract and subfractions (0–100% of MeOH) of *A. hookeri* at 5 and 20 *µ*g/mL. (**B**) NO production level of total extract and subfractions (0–100% of MeOH) of *A. hookeri* at 5 and 20 *µ*g/mL. (**C**) Cell viability of single compounds (**1–10**)at 5 and 20 *µ*M. (**D**) NO production level of single compounds (**1–10**)at 5 and 20 *µ*M.


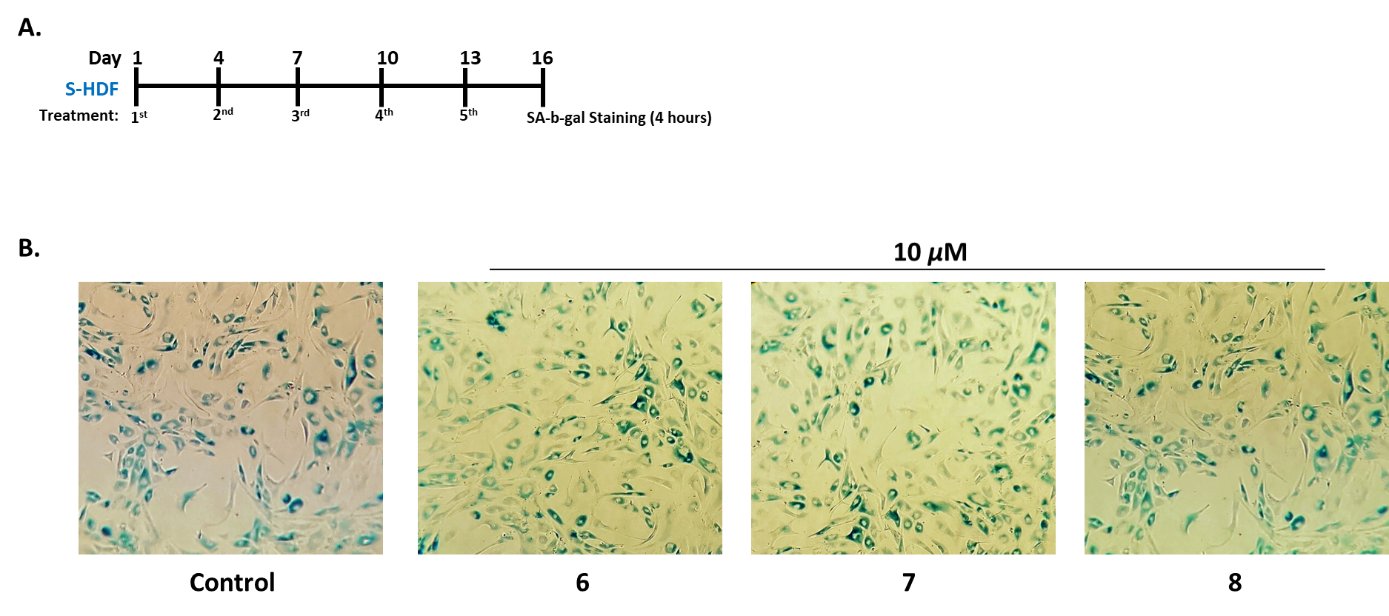


**Figure S52**. SA-*β*-gal-positive senescent cells on replicative senescent HDF cell.

Tested compounds (**6–8**) were treated at 10 *µ*M of on replicative senescent HDF cell for 15 days by every 3 internal days. No effect on reducing SA-*β*-gal staining was detected.

**Table S1**. Putative identification of components from leaves of *Allium hookeri* using HRESI-qTOF-MS/MS-based molecular networking. HRESI-qTOF-MS/MS data recorded in positive mode selective for assignment with *m/z* error less than 10 ppm. Molecular networking was created at GNPS (<https://gnps.ucsd.edu/ProteoSAFe/status.jsp?task=b6f262ecf9994b82bab562336b008eeb>)

| **No.** | **Retention time  (min)** | ***m/z*** | **Compound_Name** | **GNPSLibraryURL** | ***MZ* Error  (ppm)** |
| --- | --- | --- | --- | --- | --- |
| **1** | 3.13 | 565.1531 | 5,7-dihydroxy-2-(4-hydroxyphenyl)-8-[3,4,5-trihydroxy-6-(hydroxymethyl)oxan-2-yl]-6-(3,4,5-trihydroxyoxan-2-yl)chromen-4-one | http://gnps.ucsd.edu/ProteoSAFe/gnpslibraryspectrum.jsp?SpectrumID=CCMSLIB00004709143 | 3.46 |
| **2** | 4.08 | 463.0861 | (2S,3S,4S,5R,6S)-6-[2-(3,4-dihydroxyphenyl)-5-hydroxy-4-oxochromen-7-yl]oxy-3,4,5-trihydroxyoxane-2-carboxylic acid | http://gnps.ucsd.edu/ProteoSAFe/gnpslibraryspectrum.jsp?SpectrumID=CCMSLIB00004719166 | 1.98 |
| **3** | 4.58 | 271.0577 | 5,7-dihydroxy-2-(4-hydroxyphenyl)-4H-chromen-4-one | http://gnps.ucsd.edu/ProteoSAFe/gnpslibraryspectrum.jsp?SpectrumID=CCMSLIB00006576166 | 8.44 |
| **4** | 4.82 | 271.0592 | Genistein | http://gnps.ucsd.edu/ProteoSAFe/gnpslibraryspectrum.jsp?SpectrumID=CCMSLIB00005767064 | 2.93 |
| **5** | 5.02 | 301.0684 | Chrysoeriol | http://gnps.ucsd.edu/ProteoSAFe/gnpslibraryspectrum.jsp?SpectrumID=CCMSLIB00000205348 | 8.72 |
| **6** | 5.32 | 447.0930 | apigenin-7-O-glucuronide | http://gnps.ucsd.edu/ProteoSAFe/gnpslibraryspectrum.jsp?SpectrumID=CCMSLIB00004720077 | 2.18 |
| **7** | 5.42 | 477.1043 | (2S,3S,4S,5R,6S)-3,4,5-trihydroxy-6-[5-hydroxy-2-(4-hydroxyphenyl)-6-methoxy-4-oxochromen-7-yl]oxyoxane-2-carboxylic acid | http://gnps.ucsd.edu/ProteoSAFe/gnpslibraryspectrum.jsp?SpectrumID=CCMSLIB00004720062 | 2.75 |
| **8** | 6.41 | 1031.5452 | beta-D-Glucopyranoside, (3beta,22beta,25R)-26-(beta-D-glucopyranosyloxy)-22-hydroxyfurost-5-en-3-yl O-6-deoxy-alpha-L-mannopyranosyl-(1->2)-O-[6-deoxy-alpha-L-mannopyranosyl-(1->4)] | http://gnps.ucsd.edu/ProteoSAFe/gnpslibraryspectrum.jsp?SpectrumID=CCMSLIB00000856131 | 4.97 |
| **9** | 6.96 | 685.2728 | (1R,2S)-7-hydroxy-1-(4-hydroxy-3,5-dimethoxyphenyl)-2-N,3-N-bis[2-(4-hydroxyphenyl)ethyl]-6,8-dimethoxy-1,2-dihydronaphthalene-2,3-dicarboxamide | http://gnps.ucsd.edu/ProteoSAFe/gnpslibraryspectrum.jsp?SpectrumID=CCMSLIB00005722109 | 4.63 |
| **10** | 7.21 | 325.2239 | Denatonium | http://gnps.ucsd.edu/ProteoSAFe/gnpslibraryspectrum.jsp?SpectrumID=CCMSLIB00005755211 | 9.48 |
| **11** | 7.31 | 271.0593 | Aloe-emodin | http://gnps.ucsd.edu/ProteoSAFe/gnpslibraryspectrum.jsp?SpectrumID=CCMSLIB00005761593 | 2.59 |
| **12** | 12.13 | 415.2113 | 1-({[2-(2-furylmethyl)-5-methylpyrrolidinyl]amino}methylene)-7-[8-({[2-(2-fury lmethyl)pyrrolidinyl]amino}methylene) -1,6-dihydroxy-3-methyl-5-(methylethyl)-7 -oxo(2-naphthyl)]-3,8-dihydroxy-6-methyl-4-(methylethyl)naphthalen-2-one | http://gnps.ucsd.edu/ProteoSAFe/gnpslibraryspectrum.jsp?SpectrumID=CCMSLIB00010124460 | 1.69 |
| **13** | 13.07 | 299.0907 | 7,4-Di-O-methylapigenin | http://gnps.ucsd.edu/ProteoSAFe/gnpslibraryspectrum.jsp?SpectrumID=CCMSLIB00006421404 | 2.35 |
| **14** | 13.37 | 415.3200 | Diosgenin | http://gnps.ucsd.edu/ProteoSAFe/gnpslibraryspectrum.jsp?SpectrumID=CCMSLIB00005770460 | 2.42 |
| **15** | 14.11 | 520.3379 | PR310844 LPC 18:2 | http://gnps.ucsd.edu/ProteoSAFe/gnpslibraryspectrum.jsp?SpectrumID=CCMSLIB00005747189 | 5.98 |
| **16** | 14.91 | 518.3202 | 1-Hexadecanoyl-sn-glycero-3-phosphocholine | http://gnps.ucsd.edu/ProteoSAFe/gnpslibraryspectrum.jsp?SpectrumID=CCMSLIB00003134510 | 3.53 |
| **17** | 15.38 | 522.3552 | 1-(9Z-Octadecenoyl)-sn-glycero-3-phosphocholine | http://gnps.ucsd.edu/ProteoSAFe/gnpslibraryspectrum.jsp?SpectrumID=CCMSLIB00003139797 | 1.52 |
| **18** | 16.89 | 293.2449 | 14-(hydroxymethyl)-5,9-dimethyltetracyclo[11.2.1.0 , ?.0?,?]hexadecan-5-ol | http://gnps.ucsd.edu/ProteoSAFe/gnpslibraryspectrum.jsp?SpectrumID=CCMSLIB00004713902 | 7.18 |
| **19** | 16.94 | 524.3692 | 1-Stearoyl-2-hydroxy-sn-glycero-3-phosphocholine | http://gnps.ucsd.edu/ProteoSAFe/gnpslibraryspectrum.jsp?SpectrumID=CCMSLIB00003139075 | 4.19 |
| **20** | 17.64 | 439.3561 | 18-hydroxy-1,2,5,8,15,19,19-heptamethylpentacyclo[12.8.0.0<2,11>.0<5,10>.0<15, 20>]docos-11-ene-8-carboxylic acid | <http://gnps.ucsd.edu/ProteoSAFe/gnpslibraryspectrum.jsp?SpectrumID=CCMSLIB00010125896> | 2.01 |
| **21** | 17.64 | 279.2317 | linolenic acid | http://gnps.ucsd.edu/ProteoSAFe/gnpslibraryspectrum.jsp?SpectrumID=CCMSLIB00005738688 | 1.09 |
| **22** | 17.76 | 355.2836 | monolinolein | http://gnps.ucsd.edu/ProteoSAFe/gnpslibraryspectrum.jsp?SpectrumID=CCMSLIB00004692320 | 1.12 |
| **23** | 18.78 | 282.2793 | 9 (Z)-Octadecenamide | http://gnps.ucsd.edu/ProteoSAFe/gnpslibraryspectrum.jsp?SpectrumID=CCMSLIB00003139405 | 1.08 |
| **24** | 19.28 | 357.2980 | monoolein | http://gnps.ucsd.edu/ProteoSAFe/gnpslibraryspectrum.jsp?SpectrumID=CCMSLIB00004720009 | 5.55 |
| **25** | 19.48 | 593.2750 | Phaeophorbide a | http://gnps.ucsd.edu/ProteoSAFe/gnpslibraryspectrum.jsp?SpectrumID=CCMSLIB00010128702 | 1.75 |
